# Supplementary material for: Practical synthesis of thio-cotarnine analogues
Source: Royal Society of Chemistry journal article supplement (doi:10.1039/d5nj00005j), 2025-01-01

# **New Journal of Chemistry**

## **Supporting Information**

### **Title : Practical Synthesis of Thio-Noscapinoid**

Pradyota Kumar Behera, Amit Kumar Pradhan, Dr. Laxmidhar Rout\*

Department of Chemistry, Berhampur University  
Berhampur, Ganjam – Odisha, 760007  
Email: [ldr.chem@buodisha.edu.in](mailto:ldr.chem@buodisha.edu.in)

## Supplementary information

| SI | Content                                                          | Page      |
|----|------------------------------------------------------------------|-----------|
| 1  | Material and Methods                                             | S1        |
| 2  | Synthesis of Starting Material                                   | S1        |
| 3  | General Procedure for synthesis                                  | S3        |
| 4  | Characterization of Product                                      | S4 - S14  |
| 5  | <sup>1</sup> H (proton) and <sup>13</sup> C (carbon) NMR spectra | S15 - S36 |
| 6  | Crystallographic Data                                            | S37       |
| 7  | HRMS Data                                                        | S39       |

### 1. Material and Methods :

All reactions were performed under ambient conditions unless otherwise specified. Methanol and ethanol (99.9%) were purchased from Sigma-Aldrich. (S,R)-Noscapine, with 97% purity, was obtained from Sigma-Aldrich France. All thiophenols were sourced from Sigma, TCI, and BLD Pharma. Thin-layer chromatography (TLC) was used to monitor reactions (0.25 mm silica gel 60-F plates), and visualization was achieved under UV light. Flash chromatography was performed on silica gel (320-400 mesh) when necessary. Yields were calculated by simple filtration or after column. <sup>1</sup>H NMR spectra were recorded at 400 MHz, and <sup>13</sup>C NMR spectra at 100 MHz with complete proton decoupling. Chemical shifts are reported in ppm relative to the residual solvent peak (CDCl<sub>3</sub>) as an internal reference, with coupling constants given in Hertz. Melting points were determined using a Visualize melting point apparatus, EI model – 2935

### 2. Synthesis of Starting Material :

#### Synthesis of Cotarnine :

A 250 mL oven-dried round-bottom flask equipped with a magnetic stir bar was charged with (S,R)-noscapine (20 g, 24.2 mmol). Over the course of 5 minutes, 18% HNO<sub>3</sub> (150 mL) was added dropwise with gentle stirring at room temperature. The resulting mixture was then transferred to an oil bath and heated to 55°C for 2 hours. After 2 hours, once no more precipitate formed, the reaction was removed from the oil bath and allowed to cool at room temperature for 10 minutes. The mixture was then filtered through a Buchner funnel under vacuum to obtain

opianic acid. The yellow filtrate was neutralized gradually with 40% KOH while shaking continuously until a yellow precipitate formed (pH = 11). The precipitate was filtered, washed with cold distilled water (5 mL), and dried to yield cotarnine **I** as a yellow solid<sup>[1,2]</sup> (10 g, 90% yield).

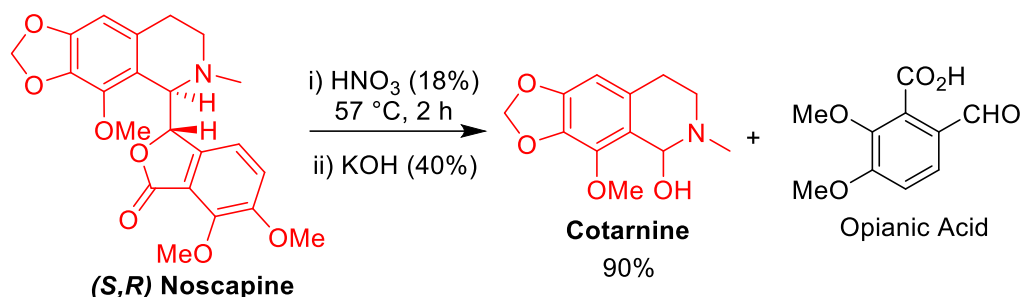

### Synthesis of 9-Bromo Noscapine :

To a flask containing noscapine (4 g, 12.1 mmol); 4 ml of 47% HBr solution is added and stirred for 5 minute. To the reaction mixture freshly prepared bromine water (3% Br<sub>2</sub>, Br<sub>2</sub>- H<sub>2</sub>O, 30-40 ml) was added dropwise until an orange precipitate appeared. The reaction mixture was then stirred at room temperature for 30 min. The above mixture was neutralized by 25% NH<sub>3</sub> and was added till pH=11 to afford white precipitate<sup>[1,2]</sup>. The solid precipitate was filtered, dried and recrystallized with ethanol to afford 9-bromo noscapine in 92% yield (5.5 g).

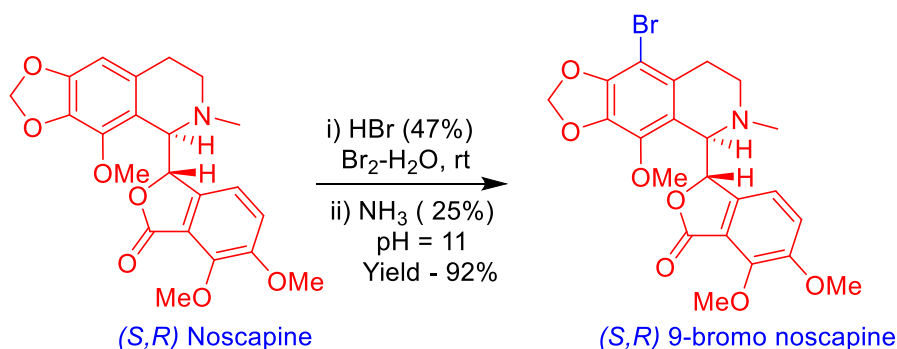

### Synthesis of 9-Bromo Cotarnine :

An oven-dried, 100 mL round bottom flask equipped with a magnetic stir bar was charged with 9-bromo-(S,R)-noscapine (3.5 g, 7.12 mmol). 20% HNO<sub>3</sub> (15mL) was added carefully and drop wise for 5 min with slow stirring at room temperature. The resulting mixture was transferred to an oil bath and heated to 62°C for 2 h. After 2 h, the reaction mixture was cooled at room temperature. The mixture was then extracted with 25 ml of dichloromethane. The water layer was then neutralized with 25% KOH with continuous shaking until yellowish precipitate

was formed (pH=11). The precipitate was filtered, washed with cold distilled water (5 mL), and dried to give 9-bromo-cotarnine<sup>[1,2]</sup> 1b as a yellowish solid product (1g, 45%)

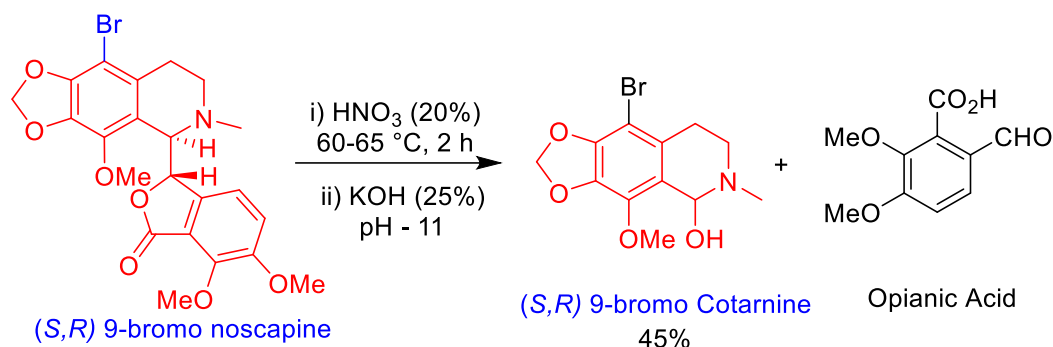

### 3. General Procedure for synthesis :

An oven dried 10ml RB was charged with cotarnine (2mmol, 474mg) and stirrer bar then put at 0 °C at 200rpm. Then cooled methanol previously stored at fridge added dropwise for complete soluble of cotarnine (400-500 μl) followed by thiol (2mmol) are added simultaneously. Then the product comes out with a precipitation formed and filtered using whattmann-42 filter paper. Then washed with chilled methanol and dried at room temperature. The ppt so collected send NMR analysis and melting point checked with visual melting point apparatus (EI model-2936).

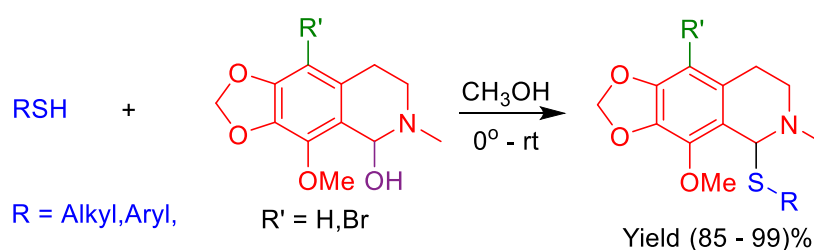

#### 4. Characterization of new Product :

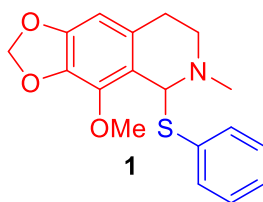

**4-methoxy-6-methyl-5-(phenylthio)-5,6,7,8-tetrahydro-[1,3]dioxolo[4,5-g]isoquinoline (1)** : Brown White Solid, Yield 604mg (92%), M.P.: 89 °C

**<sup>1</sup>H NMR (400 MHz, CDCl<sub>3</sub>)** δ 7.65 – 7.57 (m, 2H), 7.26 – 7.21 (m, 2H), 7.19 – 7.10 (m, 1H), 6.25 (s, 1H), 5.83 (d, *J* = 13.1 Hz, 3H), 4.03 (s, 3H), 2.88 (t, *J* = 6.4 Hz, 2H), 2.72 (t, *J* = 6.4 Hz, 2H), 2.30 (s, 3H).

**<sup>13</sup>C NMR (101 MHz, CDCl<sub>3</sub>)** δ 148.87, 139.24, 134.32, 131.95, 128.79, 127.67, 126.17, 121.57, 102.23, 100.75, 59.20, 45.58, 43.55, 28.27.

**HRMS** : TOF MS ESI, C<sub>18</sub>H<sub>19</sub>NO<sub>3</sub>S: *m/e* = 329.1058; Calculated for [M-PhSH] C<sub>12</sub>H<sub>14</sub>NO<sub>3</sub>; *m/e* Calculated = 220.0937, Found = 220.1023

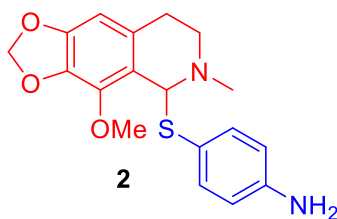

**4-((4-methoxy-6-methyl-5,6,7,8-tetrahydro-[1,3]dioxolo[4,5-g]isoquinolin-5-yl)thio)aniline (2)** : White Solid, Yield – 592mg (86%), M.P.: 120 °C.

**<sup>1</sup>H NMR (400 MHz, CDCl<sub>3</sub>)** δ 7.60 (dd, *J* = 8.5, 5.5 Hz, 2H), 6.97 (t, *J* = 8.7 Hz, 2H), 6.28 (s, 1H), 5.86 (d, *J* = 22.1 Hz, 3H), 4.08 (s, 3H), 2.95 (t, *J* = 5.9 Hz, 2H), 2.76 (t, *J* = 6.4 Hz, 2H), 2.40 (s, 3H).

**<sup>13</sup>C NMR (101 MHz, CDCl<sub>3</sub>)** δ 162.92, 160.48, 149.07, 139.25, 134.59 – 134.13, 127.79, 115.85, 115.63, 102.23, 101.51 (d, *J* = 145.7 Hz), 59.21, 45.62, 43.66, 28.18.

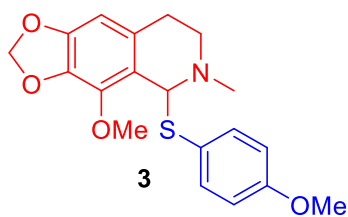

**4-methoxy-5-((4-methoxyphenyl)thio)-6-methyl-5,6,7,8-tetrahydro-[1,3]dioxolo[4,5-g]isoquinoline (3)** : White Solid, Yield 688 mg (96%), M.P: 113 °C

**<sup>1</sup>H NMR (400 MHz, CDCl<sub>3</sub>)** δ 7.57 (d, *J* = 8.6 Hz, 2H), 6.83 (d, *J* = 8.7 Hz, 2H), 6.27 (s, 1H), 5.88 (s, 3H), 4.10 (s, 3H), 3.80 (s, 3H), 2.94 (s, 2H), 2.75 (t, *J* = 6.1 Hz, 2H), 2.39 (s, 3H).

**<sup>13</sup>C NMR (101 MHz, CDCl<sub>3</sub>)** δ 158.58, 148.94, 139.30, 134.56, 134.27, 132.67, 129.91, 127.74, 121.48, 114.62, 114.32, 102.22, 100.73, 59.23, 55.33 (d, *J* = 7.5 Hz), 45.58, 43.70, 28.22.

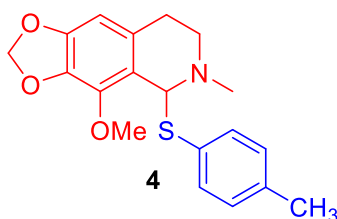

**4-methoxy-6-methyl-5-(p-tolylthio)-5,6,7,8-tetrahydro-[1,3]dioxolo[4,5-g]isoquinoline (4)**: White Solid, Yield – 644mg (94%), M.P.: 116 °C

**<sup>1</sup>H NMR (400 MHz, CDCl<sub>3</sub>)** δ 7.54 (d, *J* = 8.1 Hz, 2H), 7.09 (d, *J* = 8.0 Hz, 2H), 6.28 (s, 1H), 5.84 (d, *J* = 33.0 Hz, 3H), 4.08 (s, 3H), 2.92 (s, 2H), 2.76 (d, *J* = 6.2 Hz, 2H), 2.33 (t, *J* = 6.3 Hz, 6H).

**<sup>13</sup>C NMR (101 MHz, CDCl<sub>3</sub>)** δ 132.28, 129.78, 129.54, 128.59, 102.22, 100.71, 77.23, 59.19, 45.58 (d, *J* = 3.6 Hz), 43.60 (d, *J* = 4.1 Hz), 28.25, 21.04 (d, *J* = 3.0 Hz).

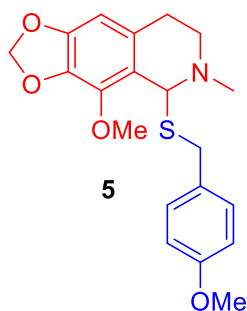

**4-methoxy-5-((4-methoxybenzyl)thio)-6-methyl-5,6,7,8-tetrahydro-[1,3]dioxolo[4,5-g]isoquinoline (5)** : White Solid, Yield 676 mg (91%) , M.P: 86 °C

**<sup>1</sup>H NMR (400 MHz, CDCl<sub>3</sub>)** δ 7.24 (d, *J* = 8.5 Hz, 2H), 6.83 (d, *J* = 8.5 Hz, 2H), 6.25 (s, 1H), 5.86 (d, *J* = 11.5 Hz, 2H), 5.25 (s, 1H), 4.03 (s, 3H), 3.88 (d, *J* = 1.7 Hz, 2H), 3.79 (s, 3H), 2.88 (dd, *J* = 9.7, 5.6 Hz, 2H), 2.74 – 2.48 (m, 2H), 2.38 (s, 3H).

**<sup>13</sup>C NMR (101 MHz, CDCl<sub>3</sub>)** δ 158.48, 148.41, 131.68, 130.52, 130.03, 127.16, 122.53, 113.82 (d, *J* = 15.7 Hz), 102.22, 100.63, 70.71, 59.23, 55.29, 45.91, 42.73 (d, *J* = 9.3 Hz), 38.28, 28.01.

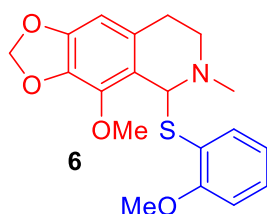

**4-methoxy-5-((2-methoxyphenyl)thio)-6-methyl-5,6,7,8-tetrahydro-[1,3]dioxolo[4,5-g]isoquinoline (6)** : White Solid, Yield 648 mg (90%), M.P.: 110 °C

**<sup>1</sup>H NMR (400 MHz, CDCl<sub>3</sub>)** δ 7.75 (d, *J* = 7.4 Hz, 1H), 7.18 (t, *J* = 7.6 Hz, 1H), 6.94 (t, *J* = 7.5 Hz, 1H), 6.83 (d, *J* = 8.2 Hz, 1H), 6.27 (s, 1H), 5.97 (s, 1H), 5.86 (s, 2H), 4.02 (s, 3H), 3.89 (s, 3H), 2.97 (t, *J* = 6.1 Hz, 2H), 2.76 (t, *J* = 6.4 Hz, 2H), 2.32 (s, 3H).

**<sup>13</sup>C NMR (101 MHz, CDCl<sub>3</sub>)** δ 157.52, 148.80, 139.37, 134.30, 133.05, 127.82, 127.71 – 127.65 (m), 127.50 (d, *J* = 22.2 Hz), 121.56, 121.35, 121.15, 110.78, 110.51, 102.24, 100.70, 75.77, 59.21, 55.86 (d, *J* = 7.9 Hz), 45.49, 42.84, 28.19.

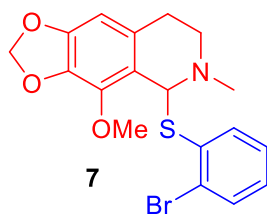

**5-((2-bromophenyl)thio)-4-methoxy-6-methyl-5,6,7,8-tetrahydro-[1,3]dioxolo[4,5-g]isoquinoline (7)** : White Solid, Yield 720 mg (88%), M.P – 109 °C

**<sup>1</sup>H NMR (400 MHz, CDCl<sub>3</sub>)** δ 7.88 (dd, *J* = 7.9, 0.9 Hz, 1H), 7.54 (d, *J* = 8.0 Hz, 1H), 7.29 (dd, *J* = 11.2, 4.0 Hz, 1H), 7.08 – 6.95 (m, 1H), 6.30 (s, 1H), 5.96 (s, 1H), 5.89 (s, 2H), 4.06 (s, 3H), 2.96 (t, *J* = 6.4 Hz, 2H), 2.78 (t, *J* = 6.4 Hz, 2H), 2.27 (s, 3H).

**<sup>13</sup>C NMR (101 MHz, CDCl<sub>3</sub>)** δ 149.14, 141.14, 139.34, 134.34, 132.98 (d, *J* = 9.6 Hz), 132.37, 128.01 (dd, *J* = 24.8, 14.1 Hz), 127.00, 125.49, 120.71, 102.33, 100.84, 78.63, 59.25, 45.58, 43.12, 28.15.

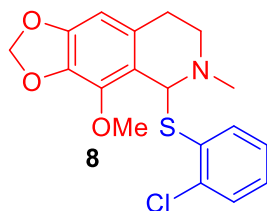

**5-((2-chlorophenyl)thio)-4-methoxy-6-methyl-5,6,7,8-tetrahydro-[1,3]dioxolo[4,5-g]isoquinoline (8)** : White Solid, Yield -620 mg (85%), M.P. : 102 °C

**<sup>1</sup>H NMR (400 MHz, CDCl<sub>3</sub>)** δ 7.87 (dd, *J* = 7.9, 1.5 Hz, 5H), 7.35 (dd, *J* = 7.9, 1.4 Hz, 7H), 7.24 – 7.19 (m, 6H), 7.10 (td, *J* = 7.7, 1.5 Hz, 7H), 6.30 (s, 5H), 5.96 (s, 5H), 5.89 (s, 11H), 4.06 (s, 14H), 2.95 (t, *J* = 6.5 Hz, 10H), 2.78 (t, *J* = 6.4 Hz, 10H), 2.27 (s, 14H).

**<sup>13</sup>C NMR (101 MHz, CDCl<sub>3</sub>)** δ 149.14, 139.34, 134.39, 132.80, 131.89, 129.69 (d, *J* = 5.4 Hz), 127.82, 127.58, 127.18 (d, *J* = 12.6 Hz), 126.73, 102.32, 100.78 (d, *J* = 8.5 Hz), 59.23, 45.55, 43.00, 28.15.



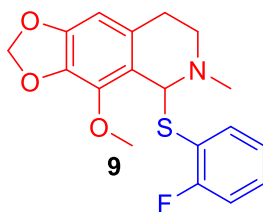

**5-((2-fluorophenyl)thio)-4-methoxy-6-methyl-5,6,7,8-tetrahydro-[1,3]dioxolo[4,5-g]isoquinoline (9)** : White Solid; Yield 576 mg (83%), M.P.: 92 °C

**<sup>1</sup>H NMR (700 MHz, CDCl<sub>3</sub>)** δ 7.74 (td, *J* = 7.6, 1.1 Hz, 1H), 7.23 – 7.15 (m, 1H), 7.09 (dd, *J* = 10.9, 4.0 Hz, 1H), 7.01 (t, *J* = 8.7 Hz, 1H), 6.28 (s, 1H), 5.90 (d, *J* = 28.5 Hz, 3H), 4.06 (s, 3H), 2.96 (t, *J* = 6.5 Hz, 2H), 2.77 (t, *J* = 6.4 Hz, 2H), 2.35 (s, 3H).

**<sup>13</sup>C NMR (176 MHz, CDCl<sub>3</sub>)** δ 161.78, 160.40, 149.07, 139.27, 134.74, 134.21, 128.22 (d, *J* = 8.0 Hz), 127.93, 124.46 (d, *J* = 3.6 Hz), 120.95, 115.60, 115.47, 102.22, 100.76, 59.20, 45.45, 43.03, 28.17.

**<sup>19</sup>F NMR (377 MHz, CDCl<sub>3</sub>)** δ -107.05 (s), -109.95 (s).

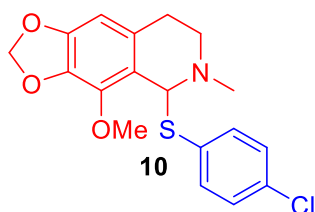

**5-((4-chlorophenyl)thio)-4-methoxy-6-methyl-5,6,7,8-tetrahydro-[1,3]dioxolo[4,5-g]isoquinoline (10)** : White Solid, Yield – 624mg (86%), M.P.: 110 °C

**<sup>1</sup>H NMR (400 MHz, CDCl<sub>3</sub>)** δ 7.56 (d, *J* = 8.5 Hz, 2H), 7.32 – 7.17 (m, 2H), 6.28 (s, 1H), 5.87 (d, *J* = 14.7 Hz, 3H), 4.06 (s, 3H), 2.92 (t, *J* = 6.4 Hz, 2H), 2.76 (t, *J* = 6.4 Hz, 2H), 2.37 (s, 3H).

**<sup>13</sup>C NMR (101 MHz, CDCl<sub>3</sub>)** δ 149.12, 139.24, 138.22, 134.25, 133.40, 132.08, 129.33 (d, *J* = 3.7 Hz), 128.87, 127.80, 121.01, 102.24, 100.81, 59.20, 45.65, 43.64, 28.19.

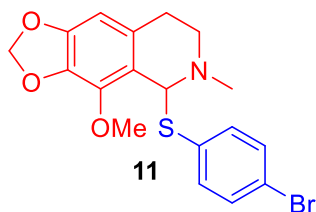

**5-((4-bromophenyl)thio)-4-methoxy-6-methyl-5,6,7,8-tetrahydro-[1,3]dioxolo[4,5-g]isoquinoline (11)** : White Solid, Yield – 744mg (91%), M.: 109 °C

**<sup>1</sup>H NMR (400 MHz, CDCl<sub>3</sub>)** δ 7.50 (d, *J* = 8.4 Hz, 2H), 7.39 (d, *J* = 8.4 Hz, 2H), 6.28 (s, 1H), 5.86 (d, *J* = 20.6 Hz, 3H), 4.06 (s, 3H), 2.91 (t, *J* = 6.4 Hz, 2H), 2.76 (t, *J* = 6.3 Hz, 2H), 2.36 (s, 3H).

**<sup>13</sup>C NMR (101 MHz, CDCl<sub>3</sub>)** δ 149.00, 139.09 (d, *J* = 12.9 Hz), 135.74, 134.25, 133.63, 132.23, 131.79, 129.42, 127.71, 121.56, 121.11, 119.99, 102.23, 100.79, 59.18, 45.61, 43.58, 28.22.

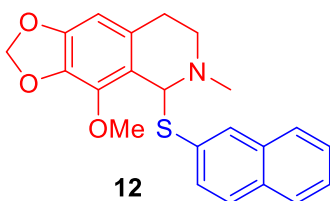

**4-methoxy-6-methyl-5-(naphthalen-2-ylthio)-5,6,7,8-tetrahydro-[1,3]dioxolo[4,5-g]isoquinoline (12)**: White Solid, 712mg (94%), M.P.: 110 °C

**<sup>1</sup>H NMR (400 MHz, CDCl<sub>3</sub>)** δ 8.11 (s, 2H), 7.84 – 7.74 (m, 9H), 7.50 – 7.40 (m, 5H), 6.30 (s, 2H), 5.94 (d, *J* = 41.6 Hz, 6H), 4.11 (s, 6H), 2.96 (t, *J* = 6.3 Hz, 4H), 2.78 (t, *J* = 6.3 Hz, 4H), 2.36 (s, 6H).

**<sup>13</sup>C NMR (176 MHz, CDCl<sub>3</sub>)** δ 134.38, 134.24, 133.47, 132.49, 129.01, 127.79, 127.48, 126.77, 126.51, 126.27, 125.64, 101.40, 100.75, 97.71, 77.25, 77.07, 76.89, 59.17, 44.92, 30.67.

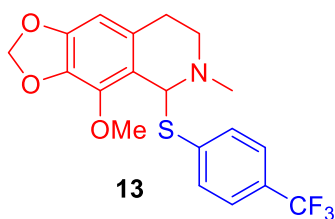

**4-methoxy-6-methyl-5-((4-(trifluoromethyl)phenyl)thio)-5,6,7,8-tetrahydro-[1,3]dioxolo[4,5-g]isoquinoline (13)** : White Solid, Yield – 674 mg (85%) , M.P.: 89 °C

**<sup>1</sup>H NMR (400 MHz, CDCl<sub>3</sub>)** δ 7.72 (d, *J* = 8.2 Hz, 2H), 7.52 (d, *J* = 8.2 Hz, 2H), 6.30 (s, 1H), 5.91 (d, *J* = 18.9 Hz, 3H), 4.03 (s, 3H), 2.91 (t, *J* = 6.3 Hz, 2H), 2.77 (t, *J* = 6.3 Hz, 2H), 2.34 (s, 3H).

**<sup>13</sup>C NMR (101 MHz, CDCl<sub>3</sub>)** δ 149.13, 145.22, 139.18, 134.26 , 131.11, 128.29 (d, *J* = 7.9 Hz), 128.04 – 127.51 (m), 127.29, 126.60, 126.47 – 125.40, 122.93, 120.88, 120.23, 102.24, 100.83, 59.14, 45.70, 43.47, 28.20.

**<sup>19</sup>F NMR (377 MHz, CDCl<sub>3</sub>)** δ -62.37 (s).

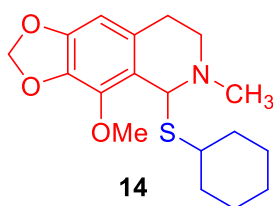

**5-(cyclohexylthio)-4-methoxy-6-methyl-5,6,7,8-tetrahydro-[1,3]dioxolo[4,5-g]isoquinoline (14)** : Gummy solid, Yield 568 mg (85%)

**<sup>1</sup>H NMR (400 MHz, CDCl<sub>3</sub>)** δ 6.24 (s, 1H), 5.84 (d, *J* = 16.8 Hz, 1H), 5.28 (s, 1H), 4.04 (s, 3H), 3.02 (td, *J* = 11.8, 4.8 Hz, 1H), 2.95 – 2.80 (m, 2H), 2.60 (ddd, *J* = 20.9, 13.8, 5.9 Hz, 2H), 2.49 (s, 3H), 2.20 (d, *J* = 12.4 Hz, 1H), 2.00 (d, *J* = 10.8 Hz, 1H), 1.76 (d, *J* = 11.3 Hz, 2H), 1.59 (d, *J* = 8.8 Hz, 1H), 1.52 – 1.43 (m, 1H), 1.30 (dt, *J* = 20.9, 11.1 Hz, 4H).

**<sup>13</sup>C NMR (101 MHz, CDCl<sub>3</sub>)** δ 148.33, 138.93 (s), 133.97, 127.12, 122.77, 102.15, 100.52, 68.74, 59.03, 46.37, 45.54, 42.96, 35.06, 34.58, 32.86, 27.88, 26.45 (d, *J* = 14.1 Hz), 25.84 .

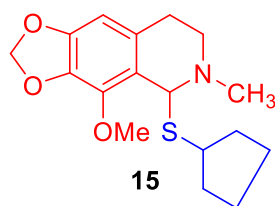

**5-(cyclopentylthio)-4-methoxy-6-methyl-5,6,7,8-tetrahydro-[1,3]dioxolo[4,5-g]isoquinoline (15):** Gummy solid, Yield 520 mg (81%)

**<sup>1</sup>H NMR (400 MHz, CDCl<sub>3</sub>)** δ 6.24 (s, 1H), 5.85 (d, *J* = 15.6 Hz, 2H), 5.29 (s, 1H), 4.05 (s, 3H), 3.37 – 3.23 (m, 1H), 3.03 (td, *J* = 11.8, 4.9 Hz, 1H), 2.94 – 2.81 (m, 1H), 2.70 – 2.54 (m, 2H), 2.52 (s, 3H), 2.19 – 1.96 (m, 2H), 1.83 – 1.67 (m, 3H), 1.53 (ddd, *J* = 16.0, 13.2, 7.3 Hz, 3H).

**<sup>13</sup>C NMR (101 MHz, CDCl<sub>3</sub>)** δ 148.35, 139.02, 127.11, 122.70, 102.19, 100.56, 77.33, 77.01, 76.70, 69.89, 59.10, 46.82, 45.53, 43.09, 34.91 (d, *J* = 7.2 Hz), 27.96, 24.80 (d, *J* = 2.8 Hz).

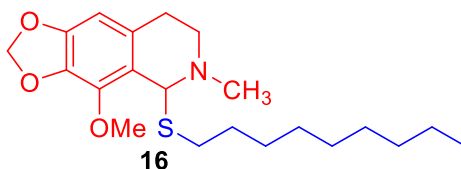

**4-methoxy-6-methyl-5-(octylthio)-5,6,7,8-tetrahydro-[1,3]dioxolo[4,5-g]isoquinoline (16)**  
: Gummy solid, Yield 640 mg (84%)

**<sup>1</sup>H NMR (400 MHz, CDCl<sub>3</sub>)** δ 6.25 (s, 1H), 5.85 (d, *J* = 13.3 Hz, 2H), 5.17 (s, 1H), 4.05 (s, 3H), 2.91 (dq, *J* = 18.2, 11.9 Hz, 2H), 2.80 – 2.53 (m, 4H), 2.49 (s, 3H), 1.70 – 1.58 (m, 2H), 1.44 – 1.17 (m, 10H), 0.88 (t, *J* = 6.5 Hz, 3H).

**<sup>13</sup>C NMR (101 MHz, CDCl<sub>3</sub>)** δ 148.35, 139.17, 134.26, 126.96, 122.84, 102.19, 100.61, 71.28, 59.20, 45.74, 42.85, 35.26, 31.84, 30.66, 29.39 – 29.00(m), 28.11, 22.66, 14.09.

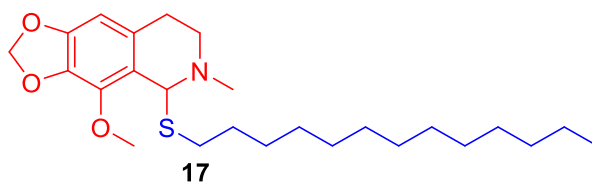

**4-methoxy-6-methyl-5-(tridecylthio)-5,6,7,8-tetrahydro-[1,3]dioxolo[4,5-g]isoquinoline**

**(17):** Yellow solid; Yield 740 mg (85%) M.P.: 45 °C

**<sup>1</sup>H NMR (400 MHz, CDCl<sub>3</sub>)** δ 6.25 (s, 1H), 5.85 (d, *J* = 12.9 Hz, 2H), 5.17 (s, 1H), 4.05 (s, 3H), 3.02 – 2.81 (m, 2H), 2.74 (ddd, *J* = 15.1, 8.8, 5.8 Hz, 2H), 2.69 – 2.50 (m, 3H), 2.49 (s, 3H), 1.62 (dd, *J* = 14.2, 6.9 Hz, 4H), 1.42 – 1.26 (m, 14H), 0.88 (t, *J* = 6.7 Hz, 4H).

**<sup>13</sup>C NMR (101 MHz, CDCl<sub>3</sub>)** δ 148.36, 139.17, 134.26, 126.96, 122.85, 102.20, 100.62, 77.35, 77.03, 76.71, 71.28, 59.2, 45.74, 42.86, 35.28, 34.07, 31.92, 30.67, 29.45(ddd, *J* = 44.7, 17.3, 7.5 Hz), 28.39, 28.11, 24.67, 22.69, 14.12.

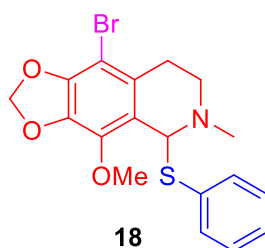

**9-bromo-4-methoxy-6-methyl-5-(phenylthio)-5,6,7,8-tetrahydro-[1,3]dioxolo[4,5-g]isoquinoline (18) :** White Solid, Yield 736 mg (90%), M.P.: 104 °C

**<sup>1</sup>H NMR (400 MHz, CDCl<sub>3</sub>)** δ 7.63 (d, *J* = 7.4 Hz, 2H), 7.29 (d, *J* = 7.1 Hz, 2H), 7.19 (t, *J* = 7.2 Hz, 1H), 5.98 (s, 2H), 5.86 (s, 1H), 4.05 (s, 3H), 2.97 (s, 2H), 2.72 (t, *J* = 5.9 Hz, 2H), 2.36 (s, 3H).

**<sup>13</sup>C NMR (101 MHz, CDCl<sub>3</sub>)** δ 139.19, 134.64, 131.93, 129.06, 128.83, 127.55, 126.94, 126.34, 101.17, 95.70, 59.33, 45.47, 43.34, 28.36.

**HRMS :** TOF MS ESI, C<sub>18</sub>H<sub>18</sub>BrNO<sub>3</sub>S: *m/e* = 407.0190, Calculated for [M-PhSH] For C<sub>12</sub>BrH<sub>13</sub>NO<sub>3</sub>; *m/e* Calculated =298.0079

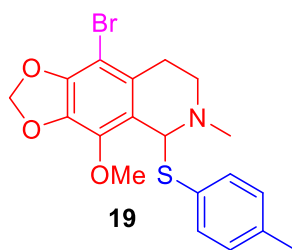

**9-bromo-4-methoxy-6-methyl-5-(p-tolylthio)-5,6,7,8-tetrahydro-[1,3]dioxolo[4,5-g]isoquinoline (19)** : White Solid, Yield 768 mg (91%), M.P.: 111 °C

**<sup>1</sup>H NMR (400 MHz, CDCl<sub>3</sub>)** δ 7.59 (dd, *J* = 8.5, 5.5 Hz, 2H), 6.98 (t, *J* = 8.7 Hz, 2H), 5.99 (s, 2H), 5.74 (s, 1H), 4.07 (s, 3H), 2.97 (s, 2H), 2.71 (t, *J* = 6.5 Hz, 2H), 2.36 (s, 3H).

**<sup>13</sup>C NMR (101 MHz, CDCl<sub>3</sub>)** δ 137.46, 133.89, 129.78, 128.56, 125.89, 122.54, 103.67, 101.10, 99.50, 77.23, 77.02, 76.70, 71.22, 60.95, 59.25, 44.81, 29.69, 21.04.

**HRMS** : TOF MS ESI, MF C<sub>18</sub>H<sub>19</sub>NO<sub>3</sub>S, *m/e* Calculated - 298.0079 Found : 298.0085

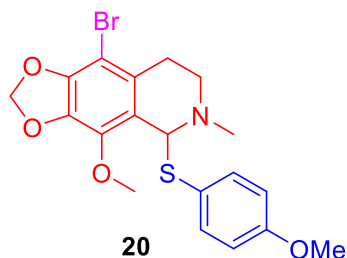

**9-bromo-4-methoxy-5-((4-methoxyphenyl)thio)-6-methyl-5,6,7,8-tetrahydro-[1,3]dioxolo[4,5-g]isoquinoline (20)**: White Solid, Yield 832 mg (95%), M.P.: 125 °C

**<sup>1</sup>H NMR (400 MHz, CDCl<sub>3</sub>)** δ 7.55 (d, *J* = 8.5 Hz, 2H), 6.83 (d, *J* = 8.6 Hz, 2H), 5.98 (s, 2H), 5.67 (s, 1H), 4.08 (s, 3H), 3.80 (s, 3H), 3.26 – 2.60 (m, 4H), 2.36 (s, 3H).

**<sup>13</sup>C NMR (101 MHz, CDCl<sub>3</sub>)** δ 158.58, 134.56, 134.27, 132.67, 114.62, 114.32, 102.22, 101.12, 100.73, 77.34, 77.02, 76.70, 59.29, 55.33, 45.58, 43.71, 28.31.

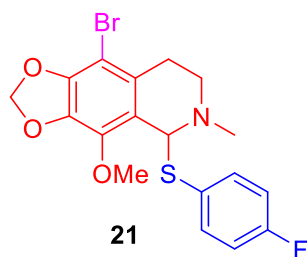

**9-bromo-5-((4-fluorophenyl)thio)-4-methoxy-6-methyl-5,6,7,8-tetrahydro-[1,3]dioxolo[4,5-g]isoquinoline (21):** White Solid, Yield – 699mg (82%), M.P.: 125 °C

**<sup>1</sup>H NMR (400 MHz, CDCl<sub>3</sub>)** δ 7.52 (dd, *J* = 8.5, 5.5 Hz, 2H), 6.91 (t, *J* = 8.7 Hz, 2H), 5.92 (s, 2H), 5.67 (s, 1H), 4.00 (s, 3H), 2.90 (s, 2H), 2.64 (t, *J* = 6.5 Hz, 2H), 2.30 (s, 3H).

**<sup>13</sup>C NMR (101 MHz, CDCl<sub>3</sub>)** δ 163.86, 143.44, 135.90, 131.30 (d, *J* = 8.3 Hz), 122.52, 116.40, 116.18, 103.70, 101.11, 99.50, 71.22, 60.92, 59.26, 48.60, 44.82, 29.69.

**<sup>19</sup>F NMR (377 MHz, CDCl<sub>3</sub>)** δ -113.49 (s), -115.43 (s).

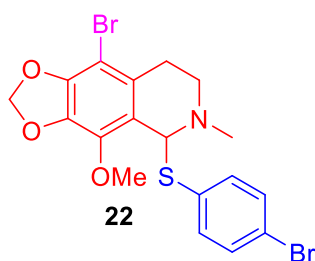

**9-bromo-5-((4-bromophenyl)thio)-4-methoxy-6-methyl-5,6,7,8-tetrahydro-[1,3]dioxolo[4,5-g]isoquinoline (22):** White Solid, Yield 837mg (86%), M.P.: 118 °C

**<sup>1</sup>H NMR (400 MHz, CDCl<sub>3</sub>)** δ 7.49 (d, *J* = 8.4 Hz, 2H), 7.40 (d, *J* = 8.4 Hz, 2H), 5.99 (s, 2H), 5.78 (s, 1H), 4.04 (s, 3H), 2.94 (t, *J* = 6.3 Hz, 2H), 2.71 (t, *J* = 6.5 Hz, 2H), 2.34 (s, 3H).

**<sup>13</sup>C NMR (101 MHz, CDCl<sub>3</sub>)** δ 135.82 (d, *J* = 14.8 Hz), 132.23, 129.43, 121.56, 101.11, 99.51, 77.23, 71.22, 59.26, 44.82, 29.69.

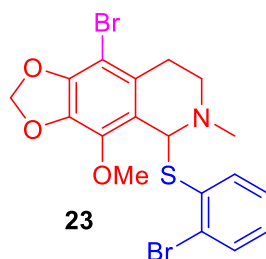

**9-bromo-5-((2-bromophenyl)thio)-4-methoxy-6-methyl-5,6,7,8-tetrahydro-[1,3]dioxolo[4,5-g]isoquinoline (23)** : White Solid, Yield 827mg (85%), M.P.: 111 °C

**<sup>1</sup>H NMR (400 MHz, CDCl<sub>3</sub>)** δ 7.84 (d, *J* = 7.7 Hz, 1H), 7.54 (t, *J* = 7.2 Hz, 1H), 7.30 (t, *J* = 7.6 Hz, 1H), 7.06 (dt, *J* = 15.4, 7.6 Hz, 1H), 6.09 (s, 1H), 6.01 (s, 2H), 4.05 (s, 3H), 3.05 (t, *J* = 6.3 Hz, 2H), 2.77 (t, *J* = 6.5 Hz, 2H), 2.36 (s, 3H).

**<sup>13</sup>C NMR (101 MHz, CDCl<sub>3</sub>)** δ 138.80, 134.66, 133.11, 132.20, 127.86, 127.28 (d, *J* = 16.4 Hz), 101.27, 95.79, 59.41, 45.52, 42.98, 29.69, 28.22.

#### Reference:

1. Metal-Free Activation of a C(sp)-H Bond of Aryl Acetylenes , Laxmidhar Rout, Dr. Dr. Jean-Claude Florent, Dr. Ludger Johannes, Santosh Kumar Choudhury, Joe Scanlon and Emmanuel Bertounesque *Chem. - A Europ. J.* 2016, **22**, 14812–14815.
2. Metal Free Activation of C(SP<sup>3</sup>)-H Bond, Practical and Rapid Synthesis of Privileged 1-Substituted-1,2,3,4-Tetrahydroisoquinolines, S. K. Choudhury, P. Rout, J-C. Florent, L. Johannes, E. Bertounesque, Prof. Laxmidhar Rout, *Eur J. Org. Chem.* 2017, **35**, 5275-5292.



## **5. $^1\text{H}$ (proton) and $^{13}\text{C}$ (carbon) NMR spectra**

### <sup>1</sup>H NMR of Compound (1)

29.10.2024  
1H of P-527

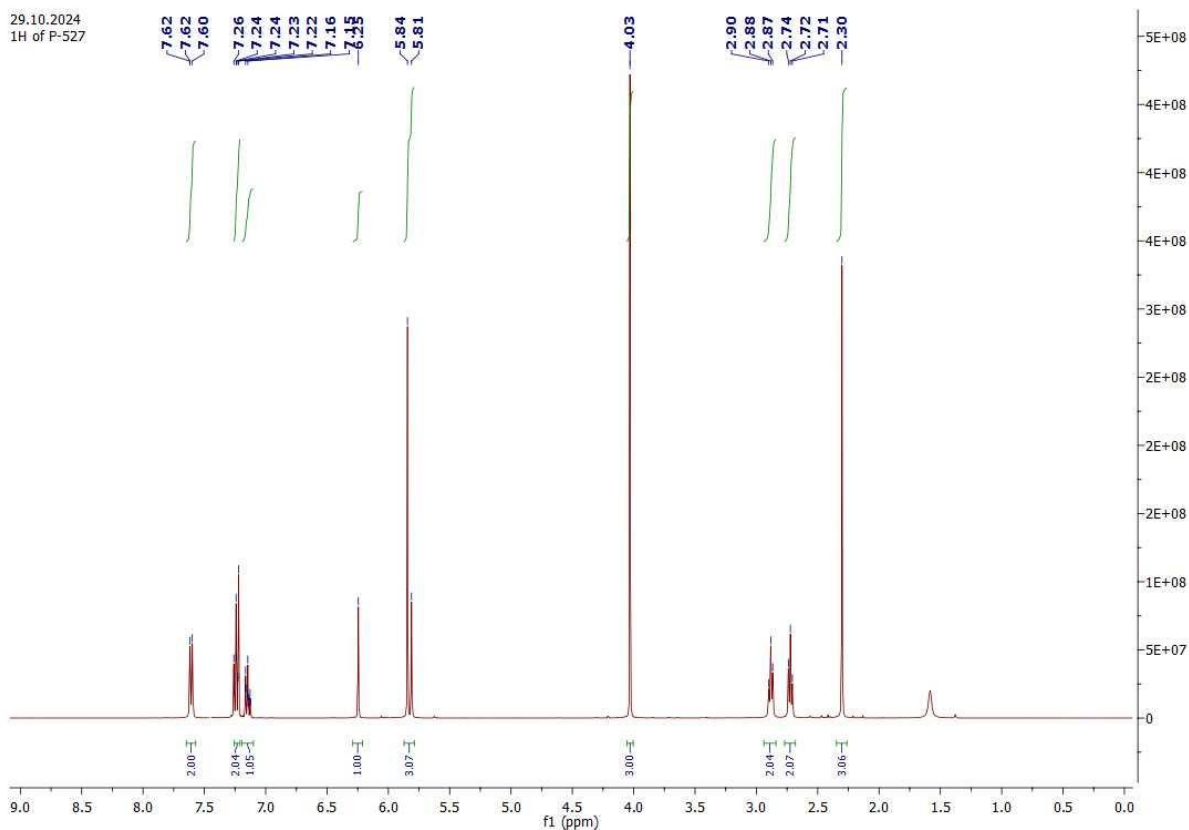

### <sup>13</sup>C NMR of Compound (1)

29.10.2024  
13C of P527

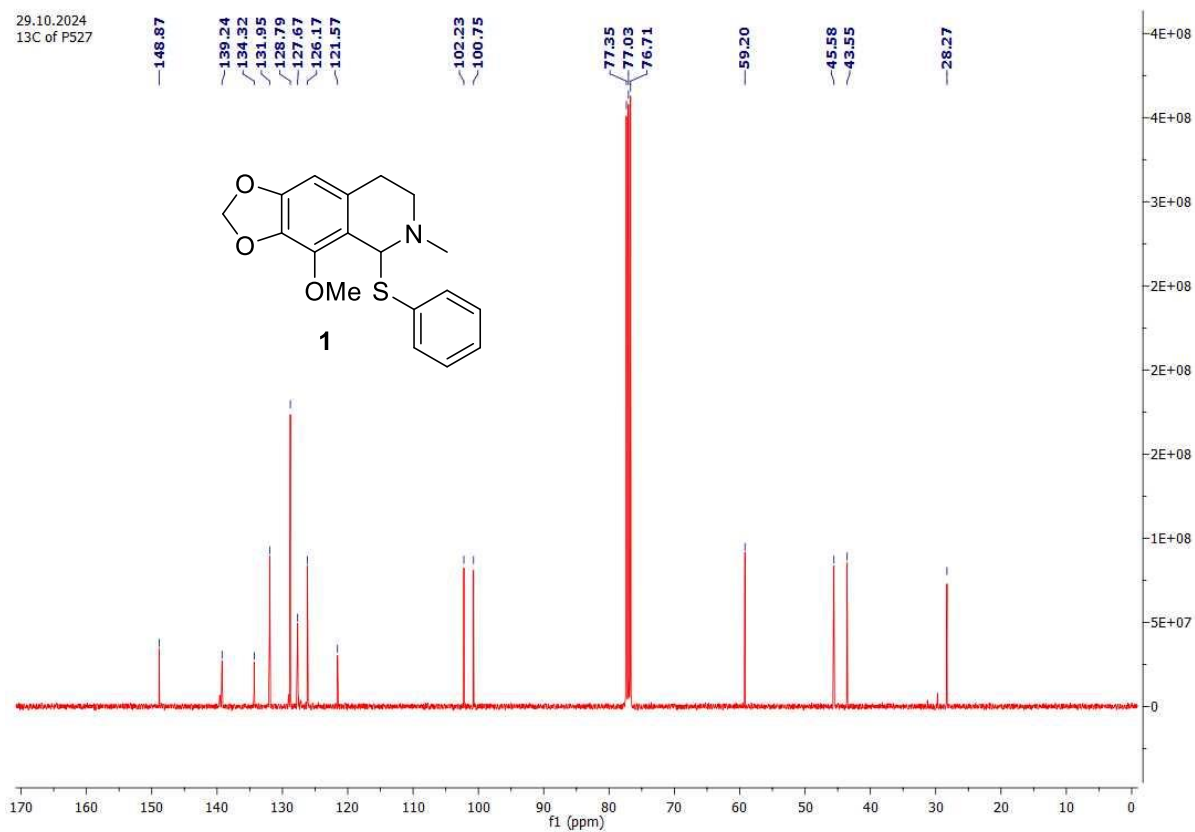

### <sup>1</sup>H NMR of Compound (2)

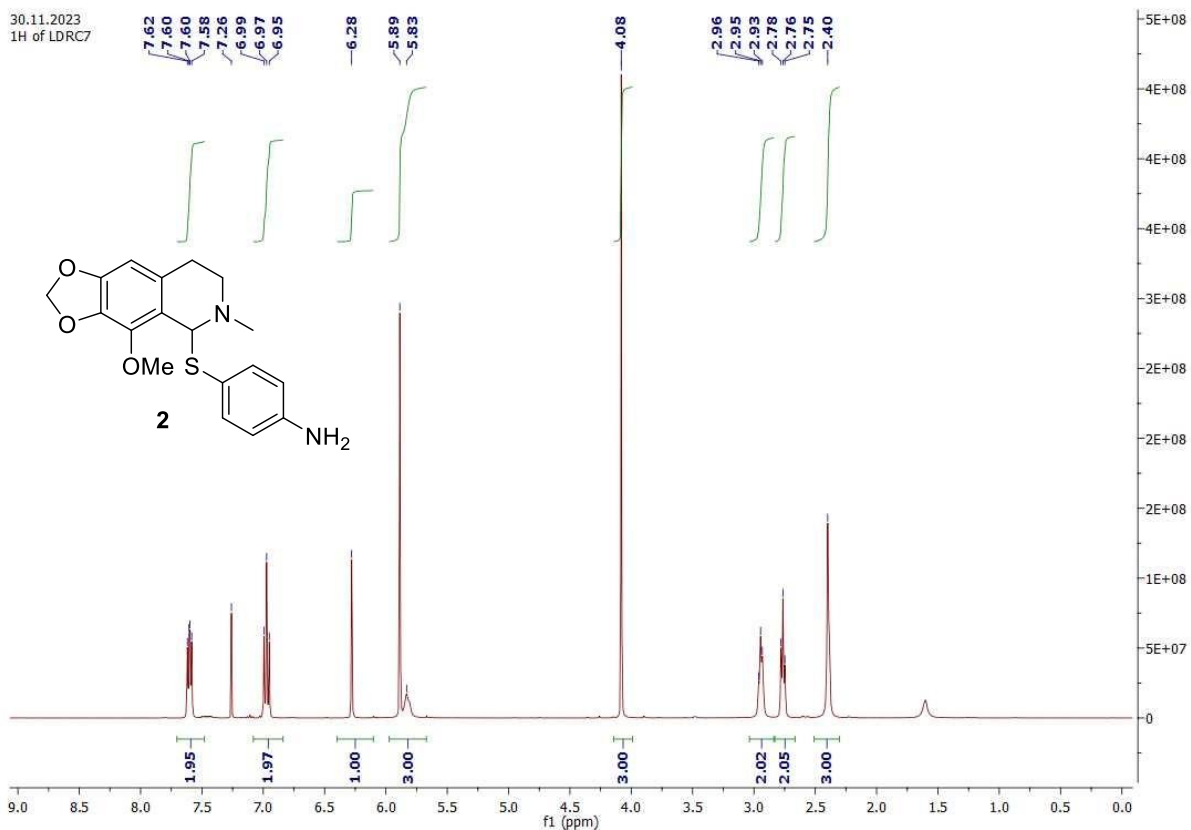

### <sup>13</sup>C NMR of Compound (2)

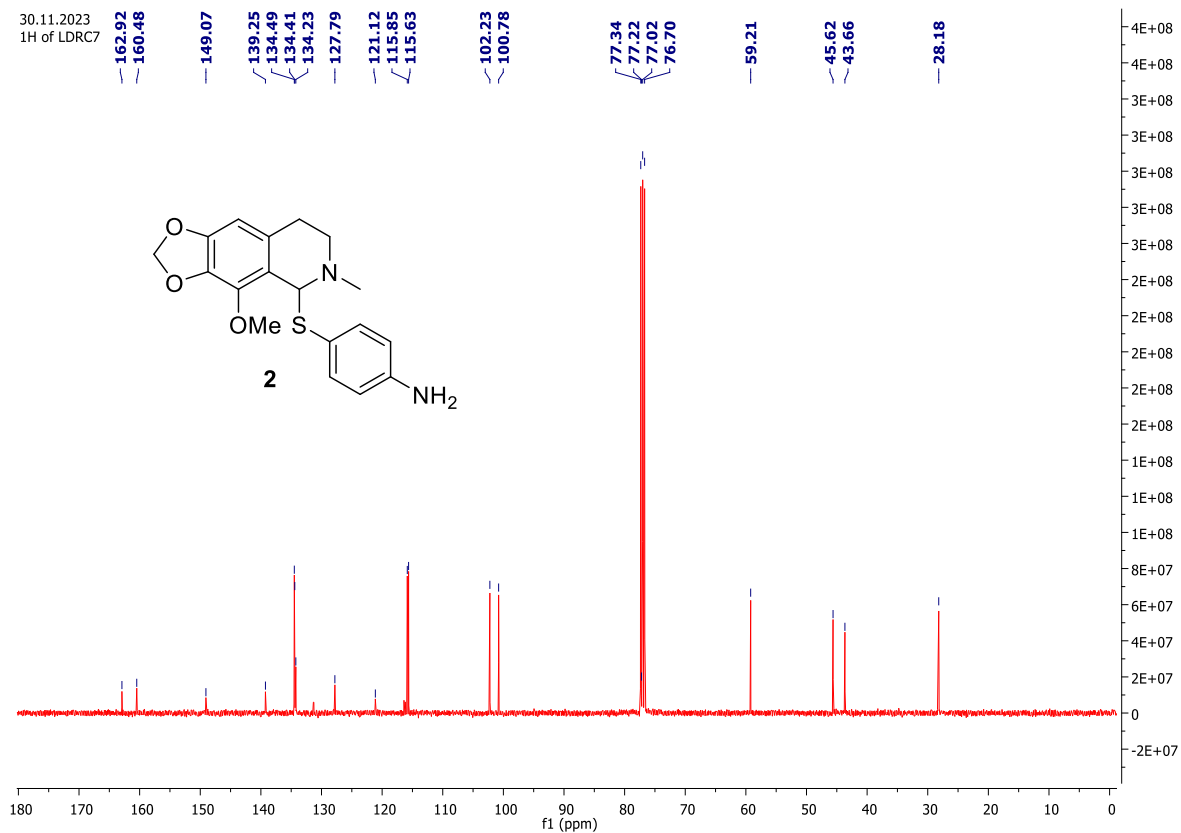

### <sup>1</sup>H NMR of Compound (3)

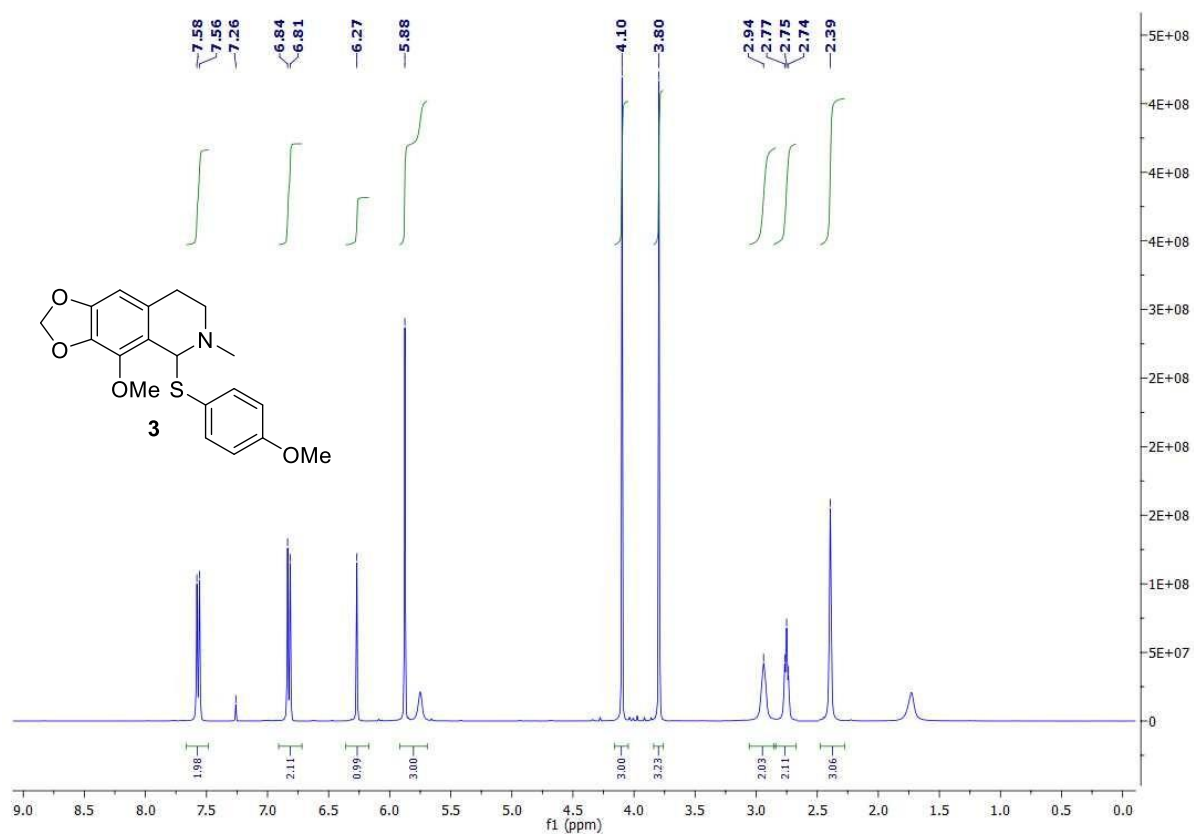

### <sup>13</sup>C NMR of Compound (3)

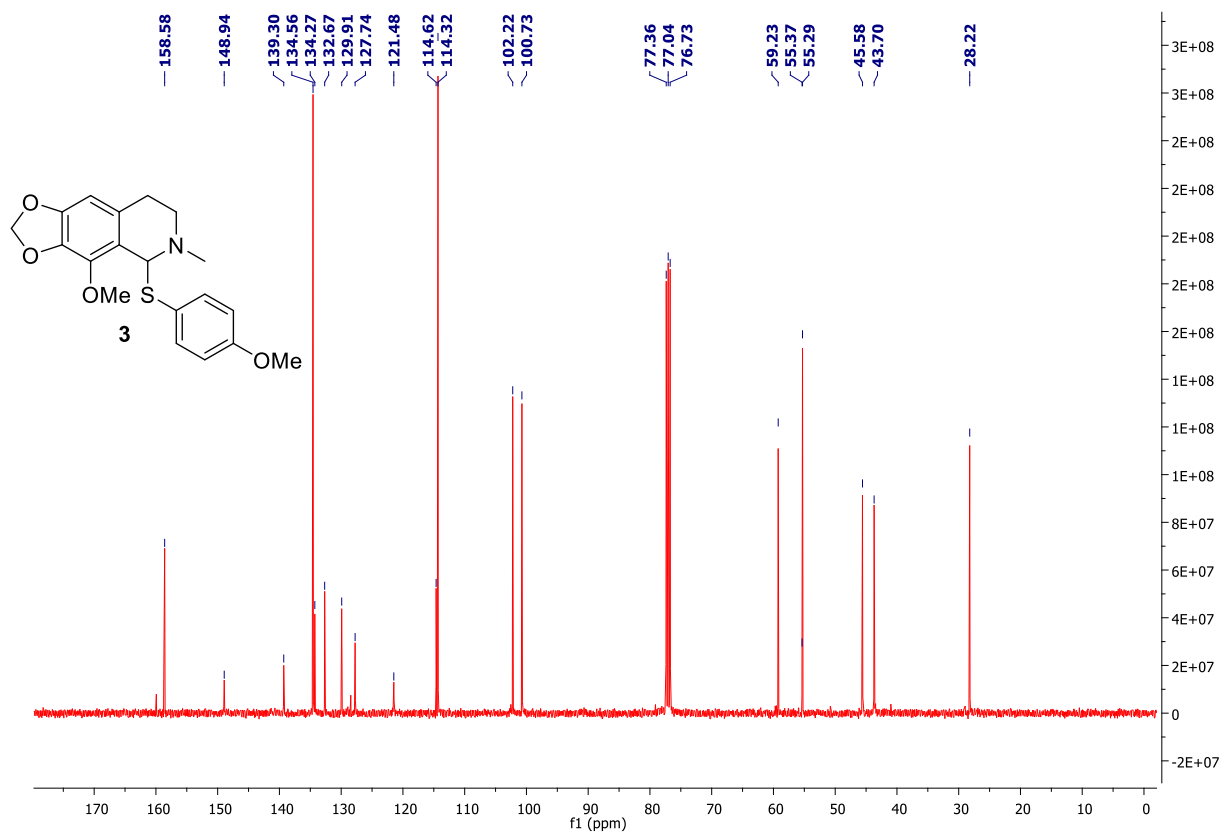

### <sup>1</sup>H NMR of Compound (4)

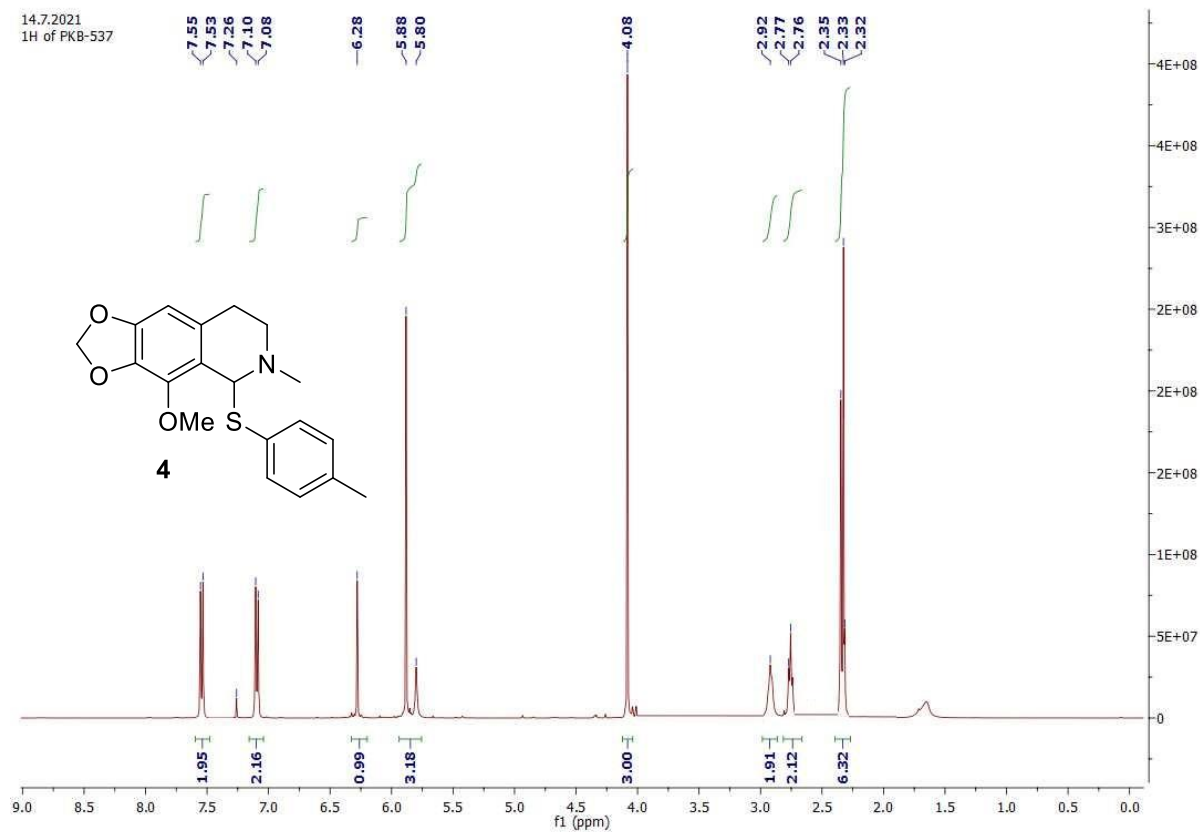

### <sup>13</sup>C NMR of Compound (4)

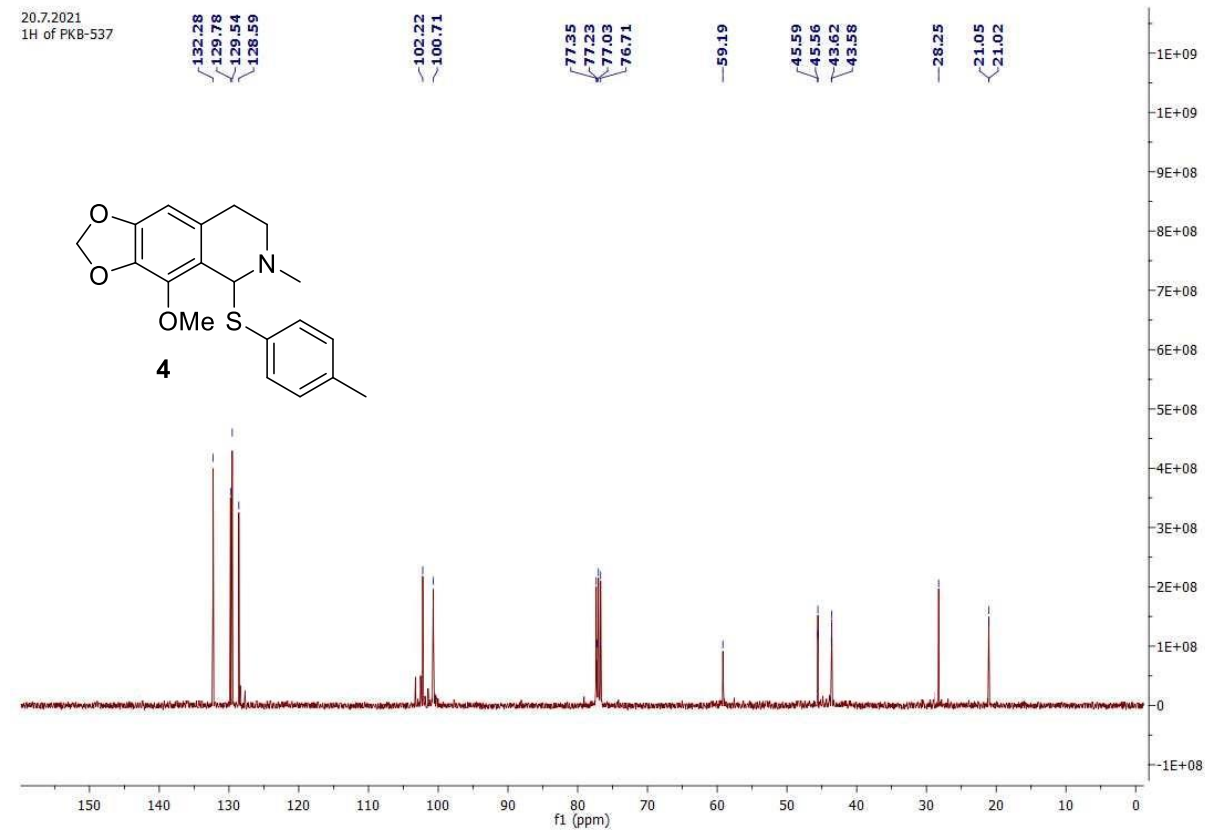

### <sup>1</sup>H NMR of Compound (5)

6.8.2024  
1H of LD-C-18

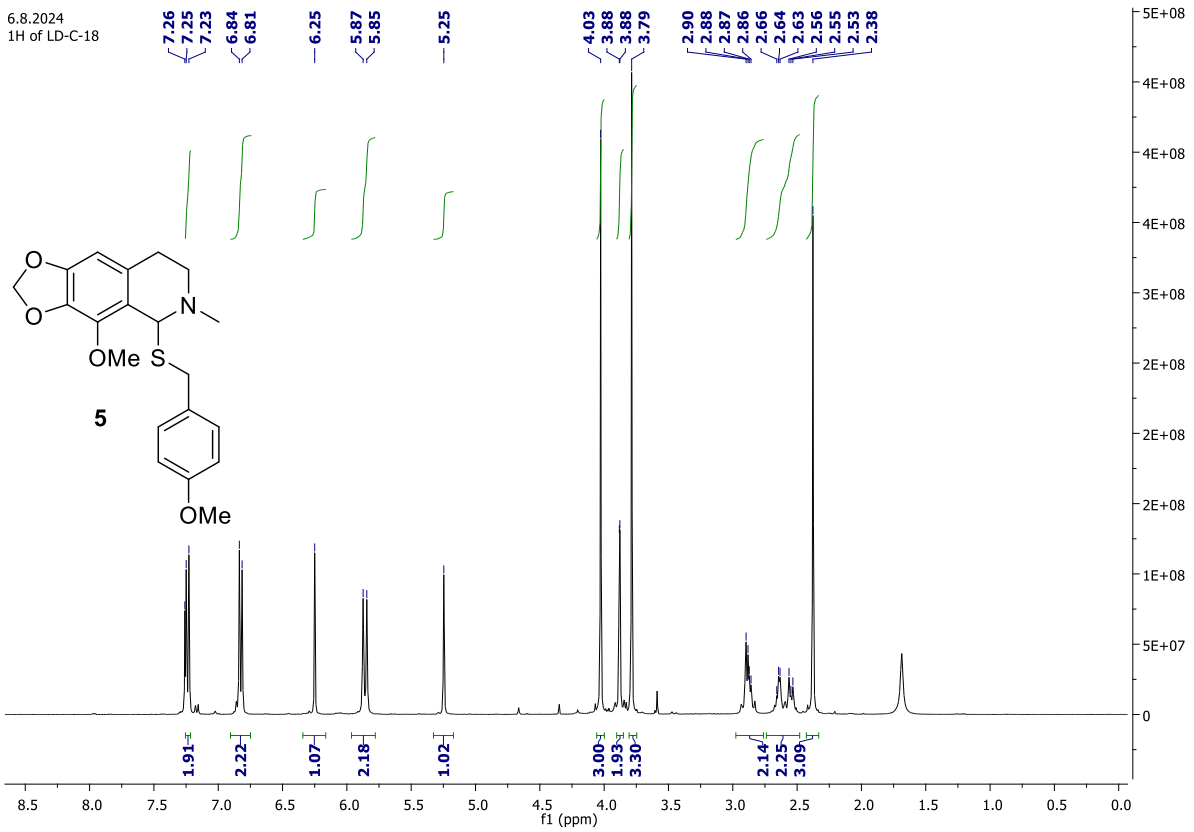

### <sup>13</sup>C NMR of Compound (5)

8.8.2024  
13C of LD-C-18

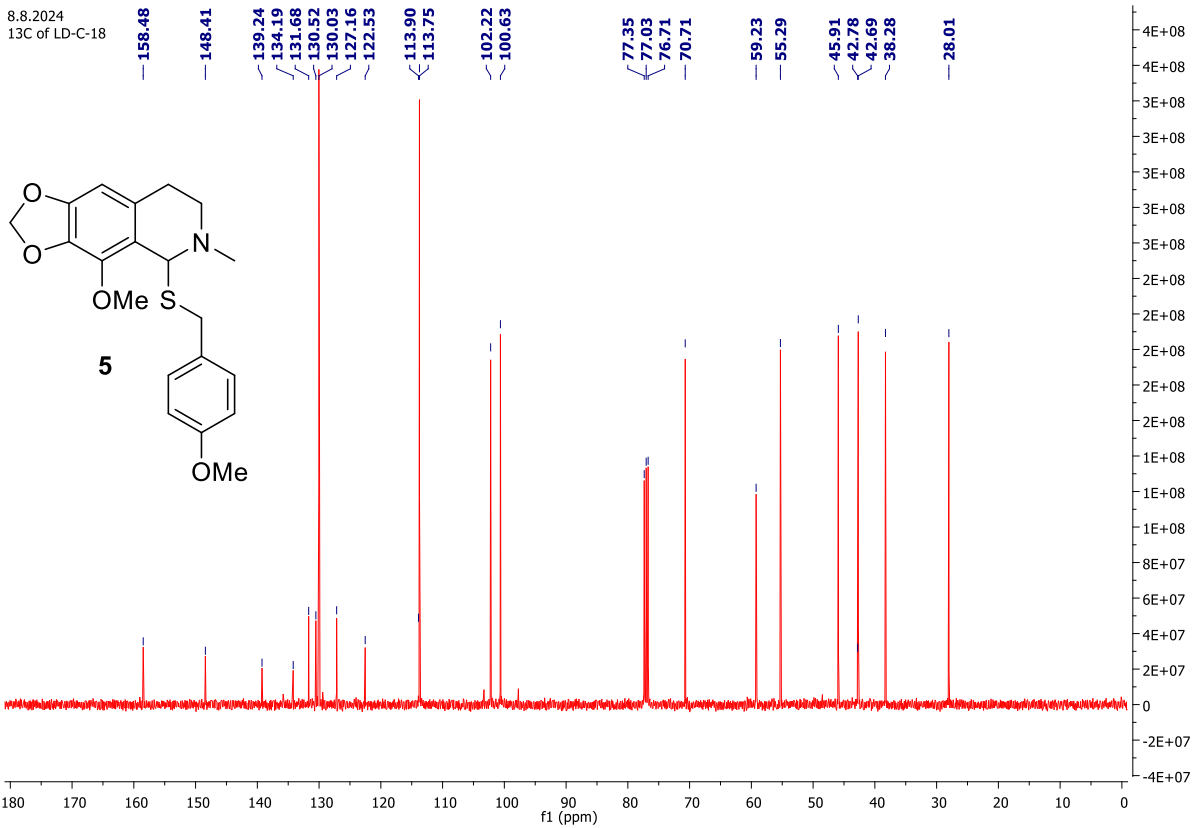

### <sup>1</sup>H NMR of Compound (6)

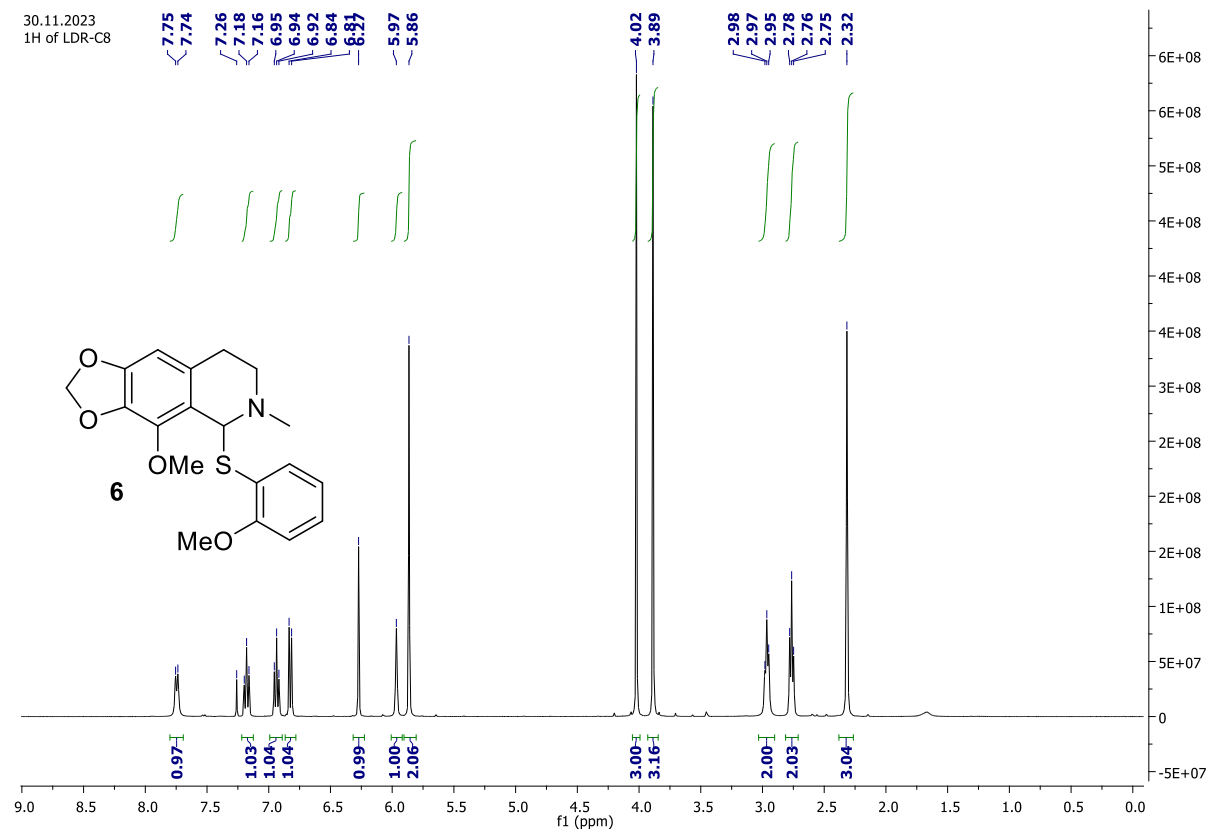

### <sup>13</sup>C NMR of Compound (6)

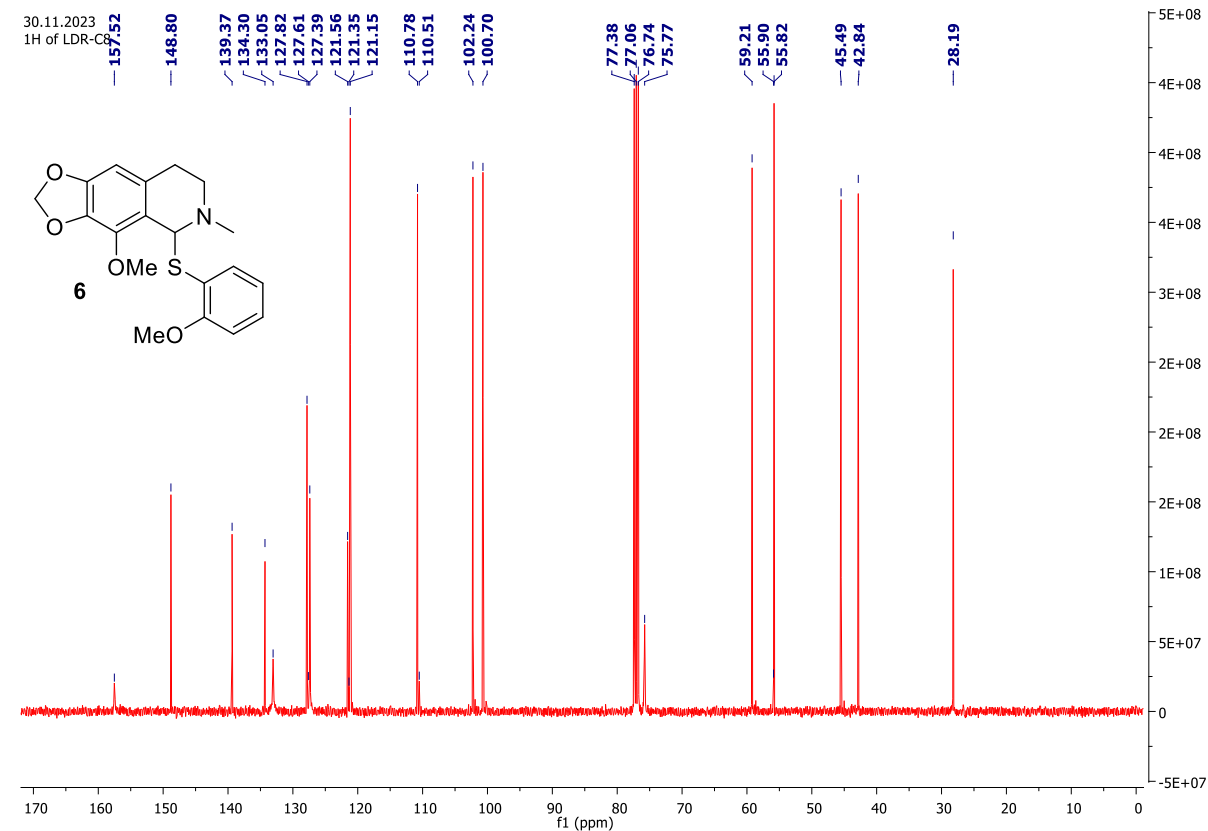

### <sup>1</sup>H NMR of Compound (7)

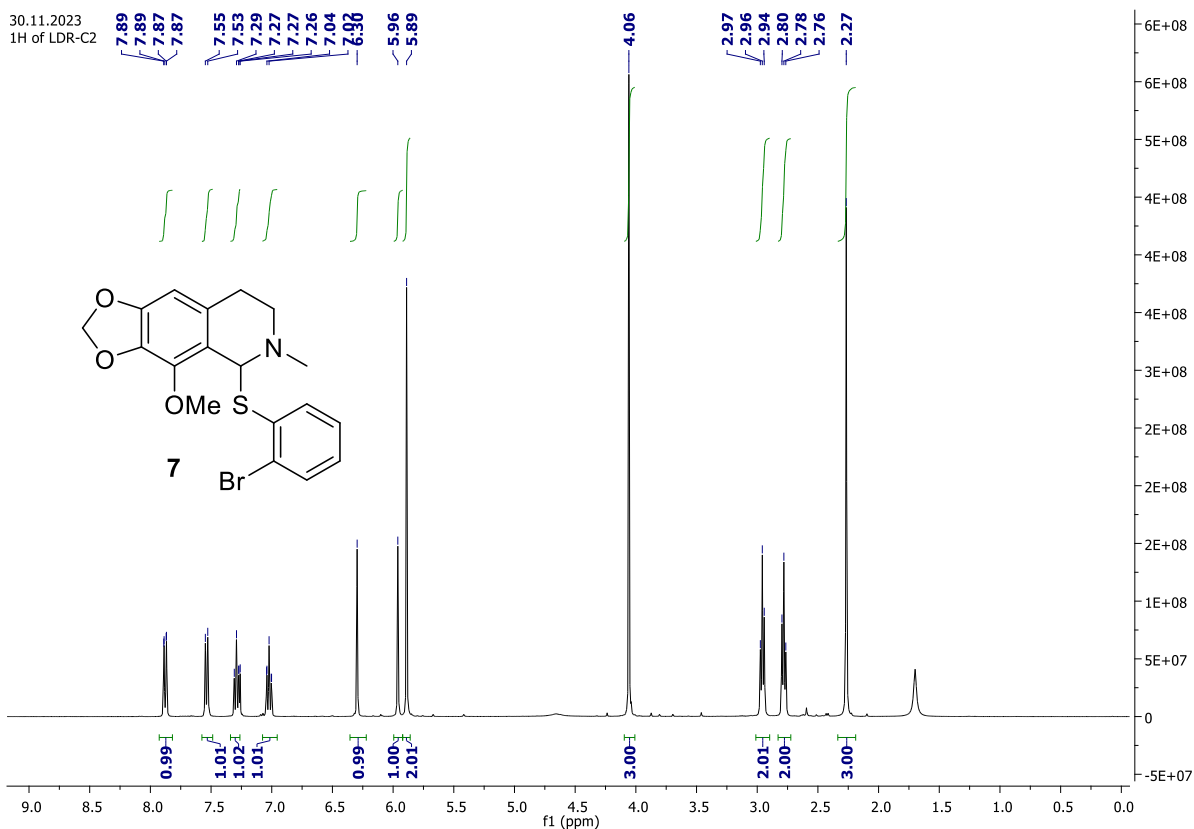

### <sup>13</sup>C NMR of Compound (7)

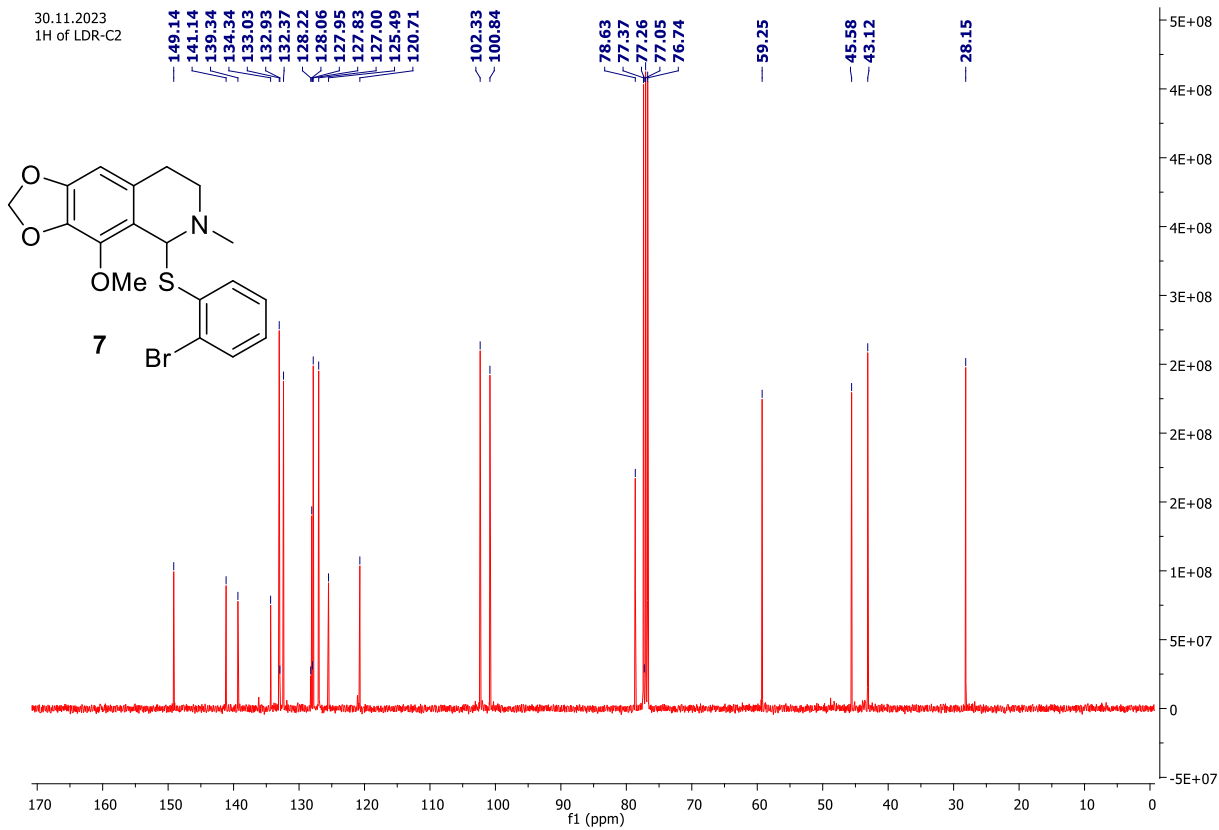



### <sup>1</sup>H NMR of Compound (8)

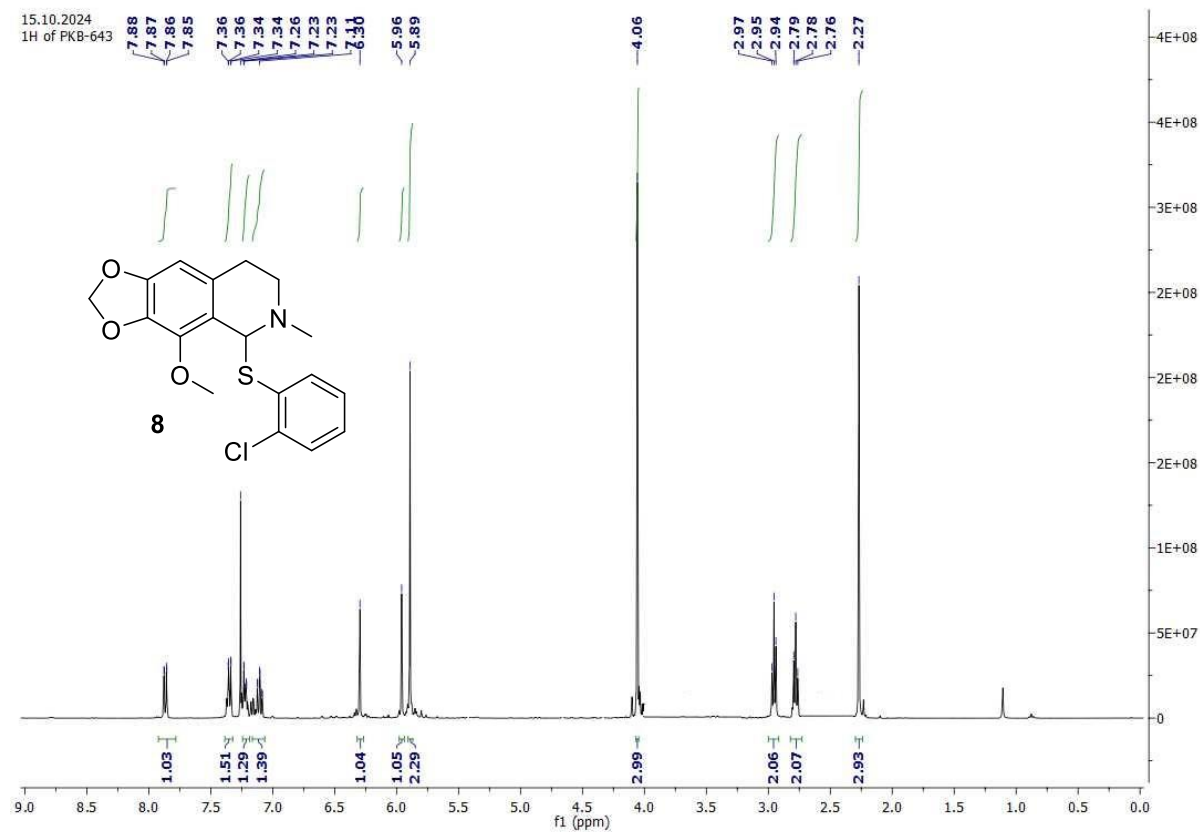

### <sup>13</sup>C NMR of Compound (8)

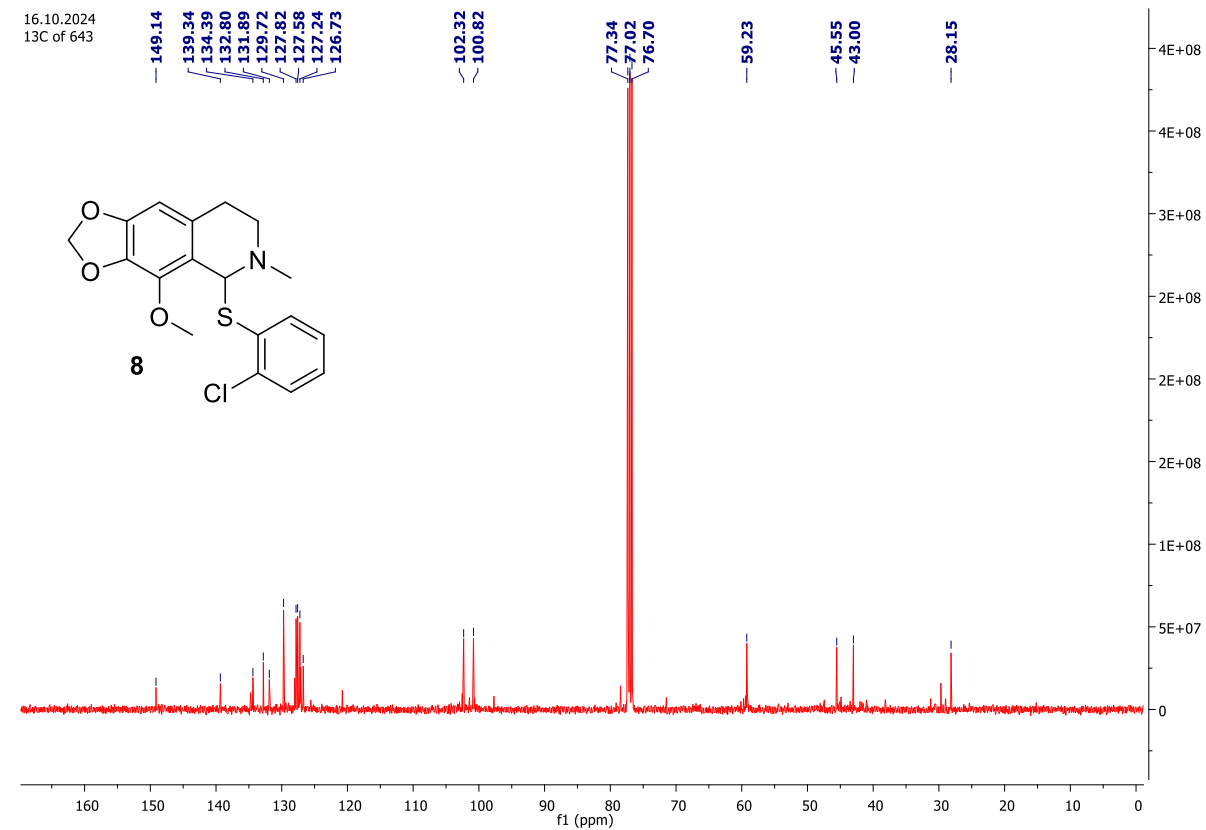

### <sup>1</sup>H NMR of Compound (9)

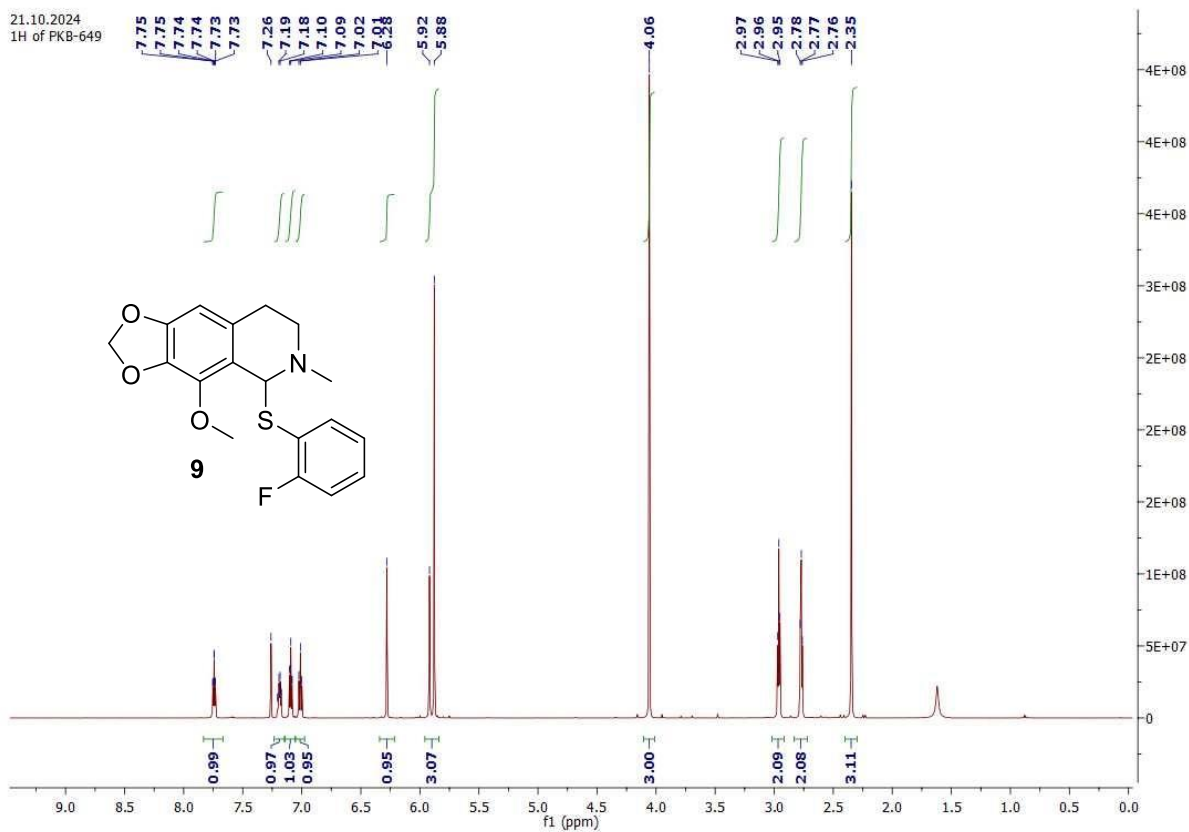

### <sup>13</sup>C NMR of Compound (9)

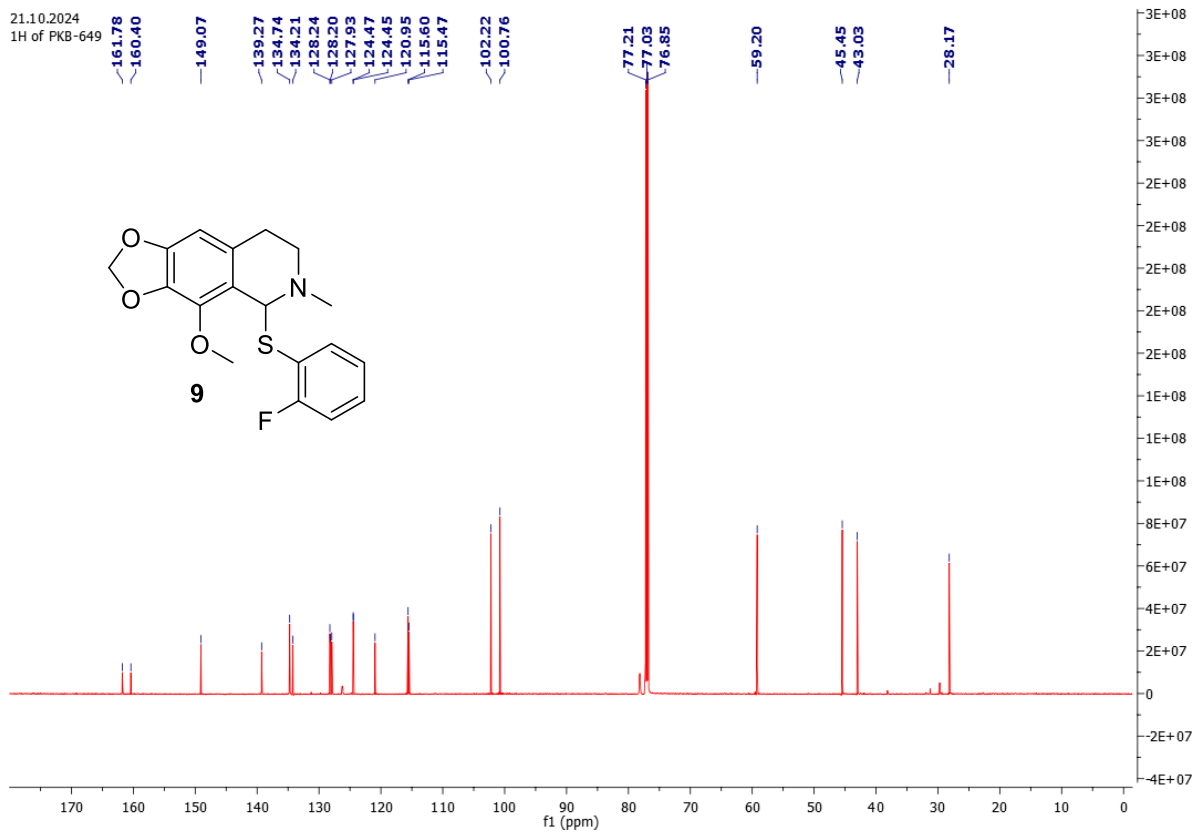

# <sup>19</sup>F NMR of Compound (9)

3.2.2025  
19F OF AD- AS--PKB-649

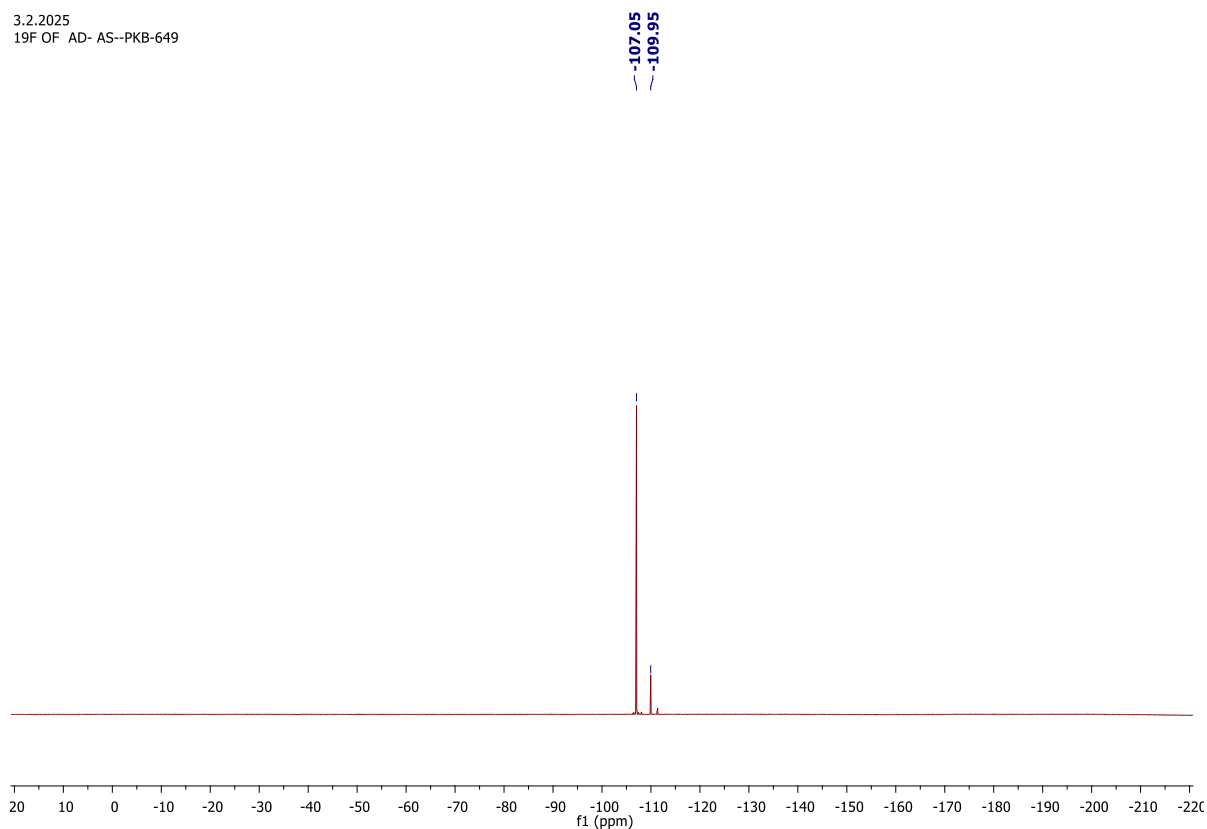

# <sup>1</sup>H NMR of Compound (10)

30.11.2023  
1H of LDR-C6

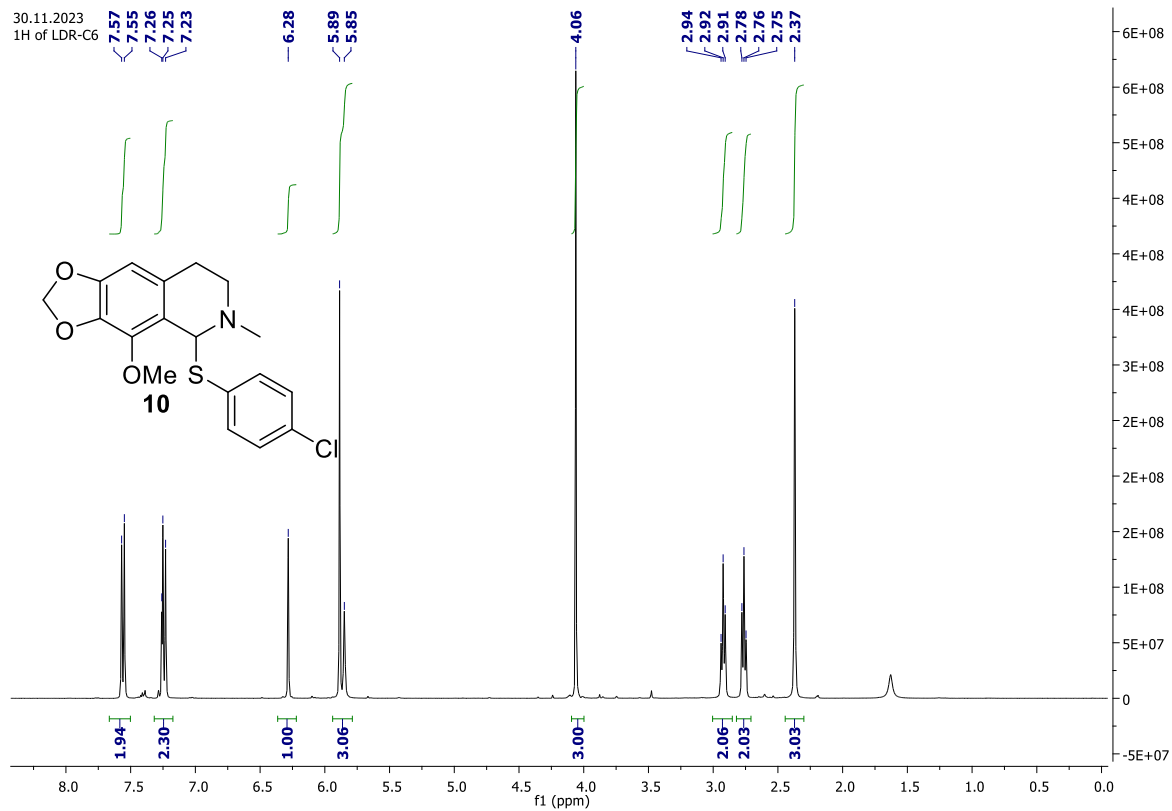

### <sup>13</sup>C NMR of Compound (10)

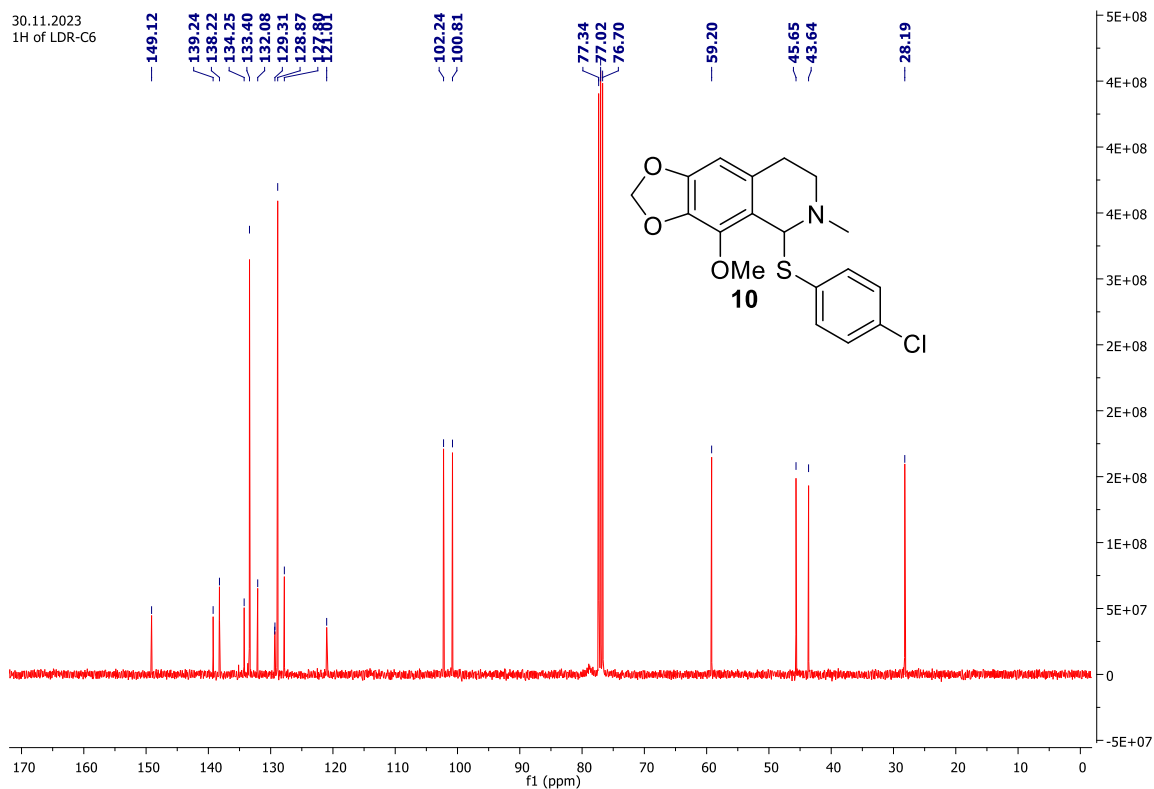

### <sup>1</sup>H NMR of Compound (11)

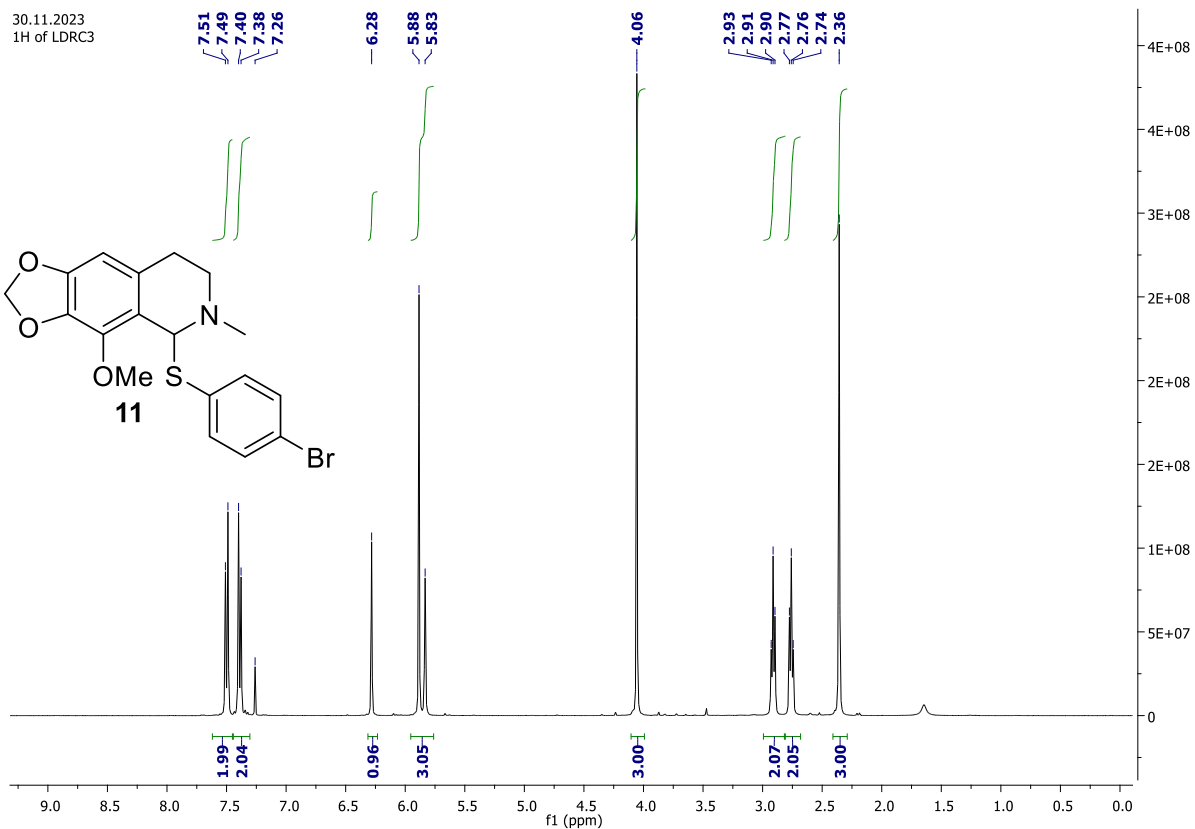

### <sup>13</sup>C NMR of Compound (11)

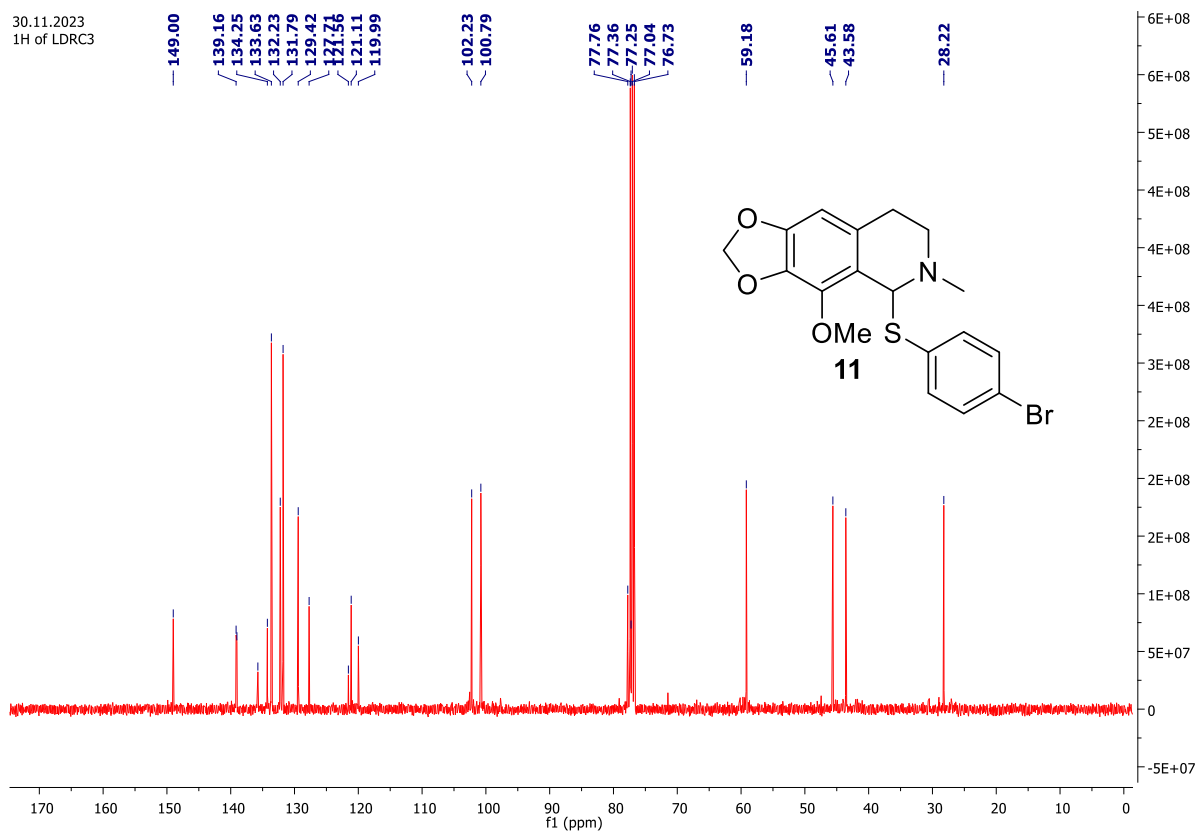

### <sup>1</sup>H NMR of Compound (12)

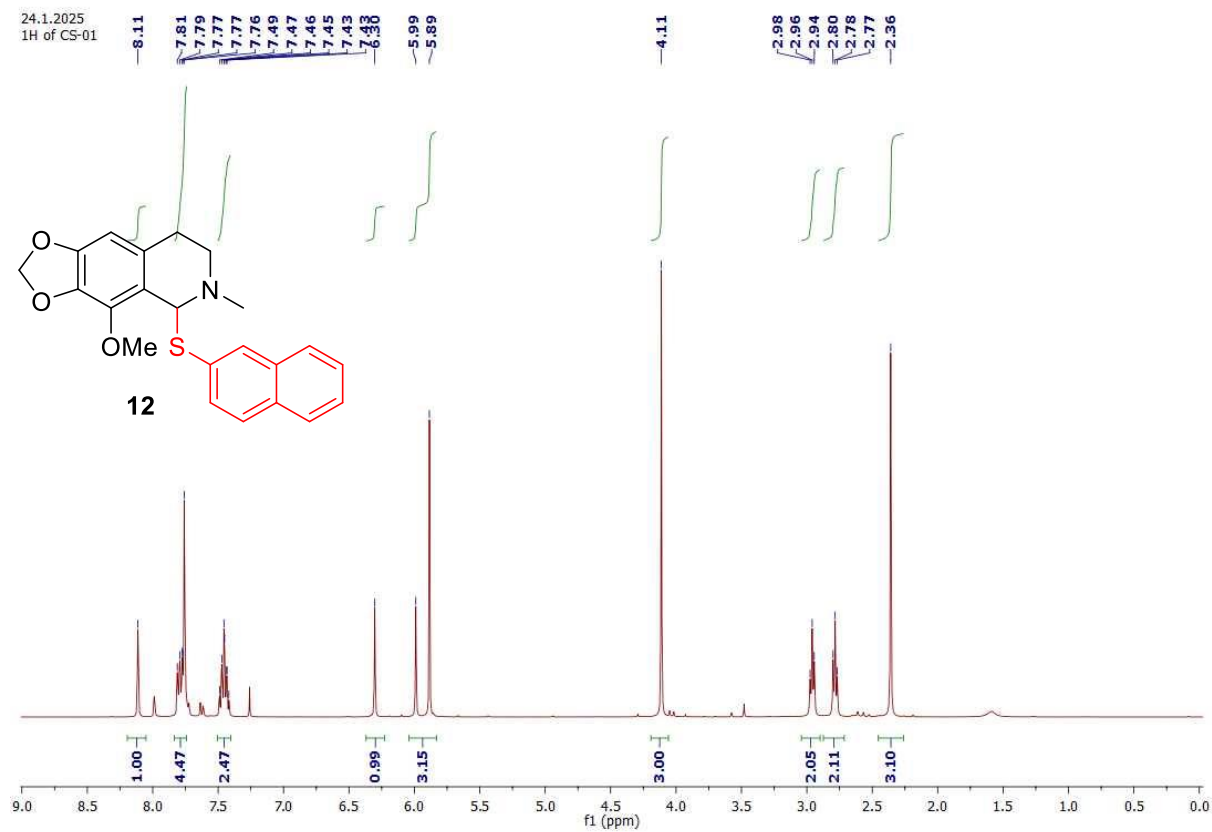

### <sup>13</sup>C NMR of Compound (12)

3.2.2025 p ratas  
1H of PKB-CS-1

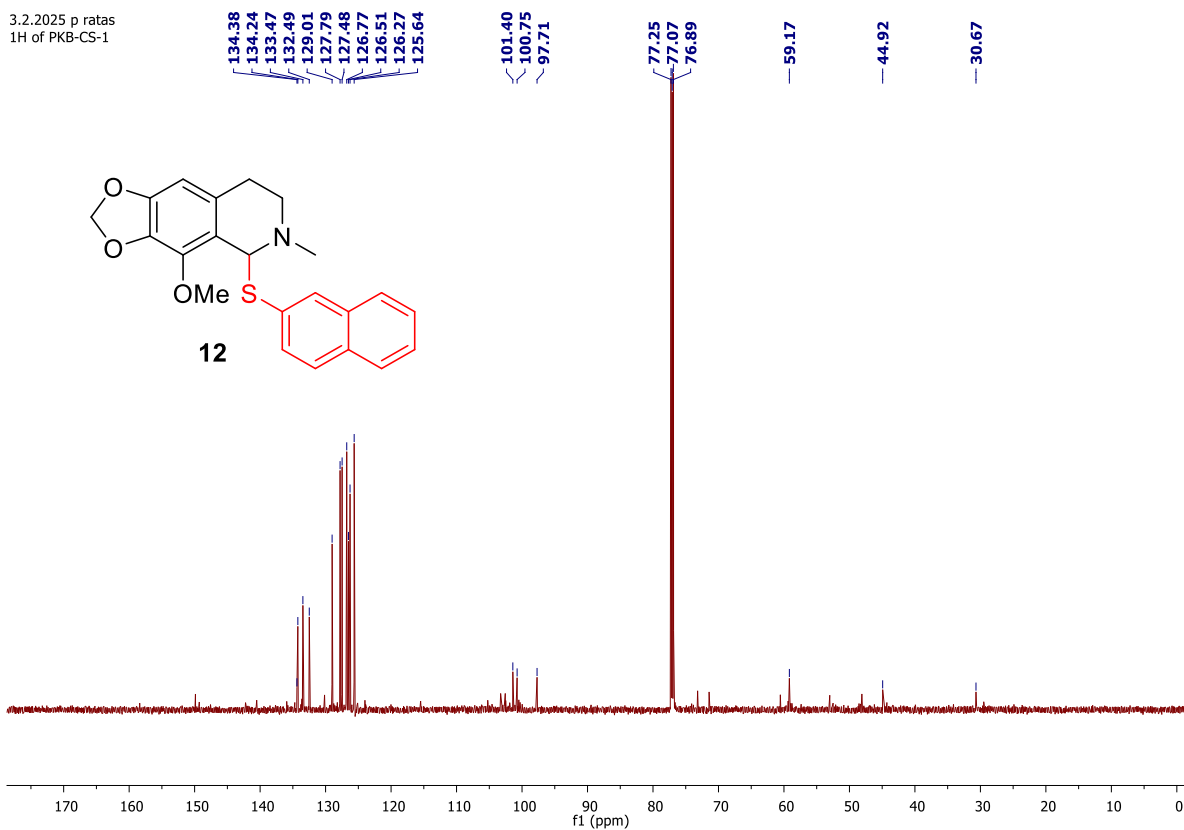

### <sup>1</sup>H NMR of Compound (13)

03.02.2025  
1H OF CS-04

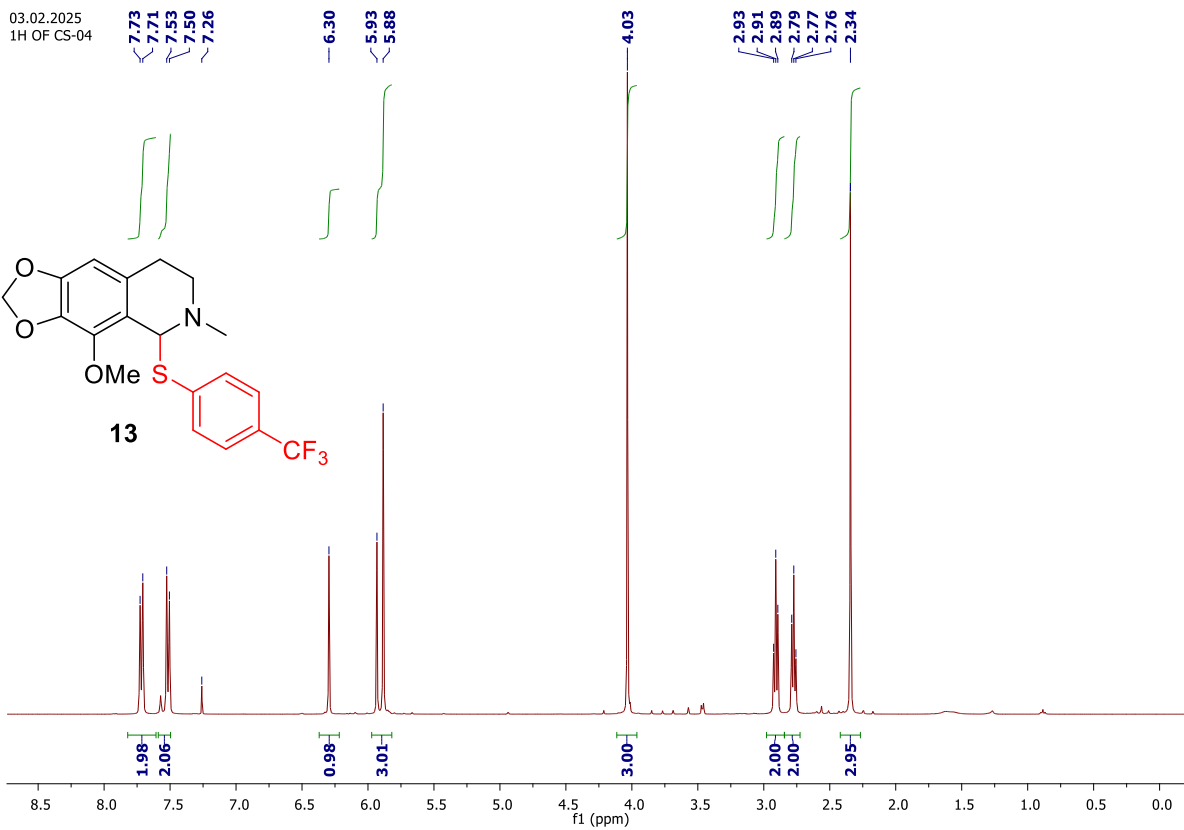

### <sup>13</sup>C NMR of Compound (13)

03.02.2025  
1H OF CS-04

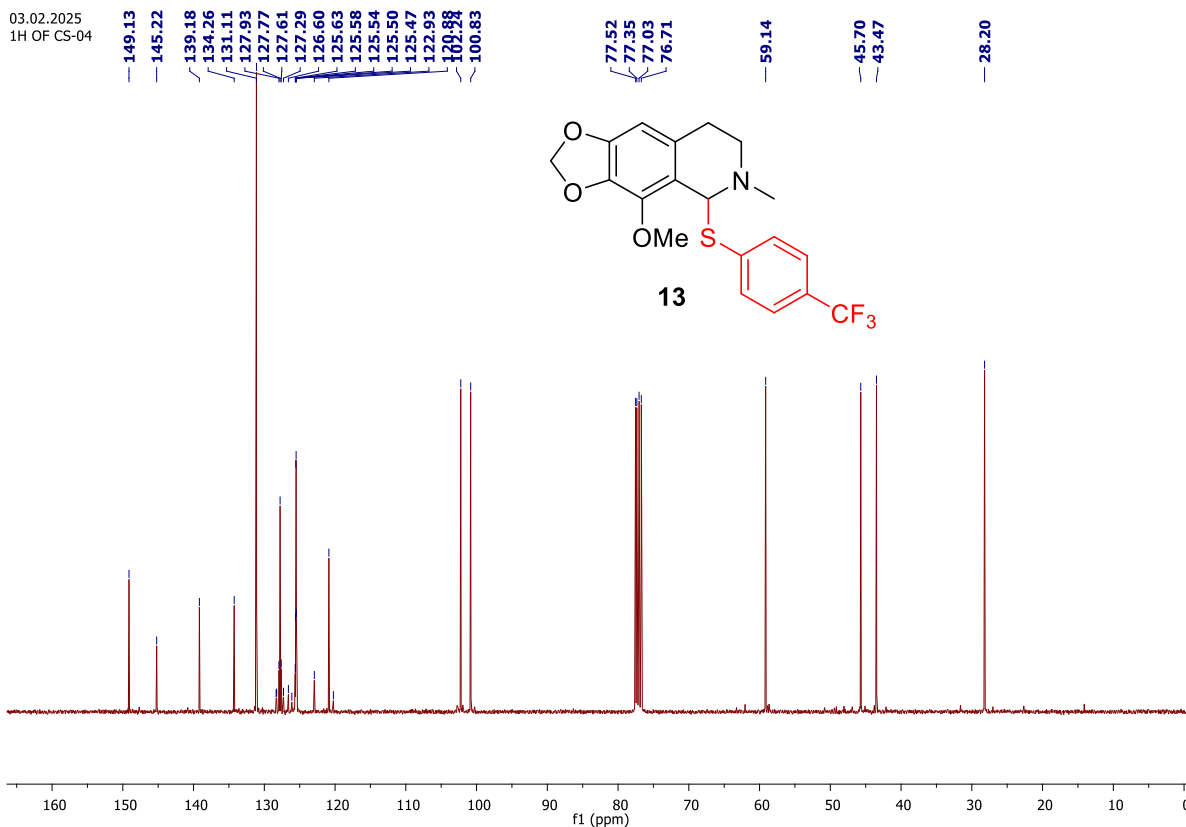

### <sup>19</sup>F NMR of Compound (13)

03.02.2025  
1H OF CS-04

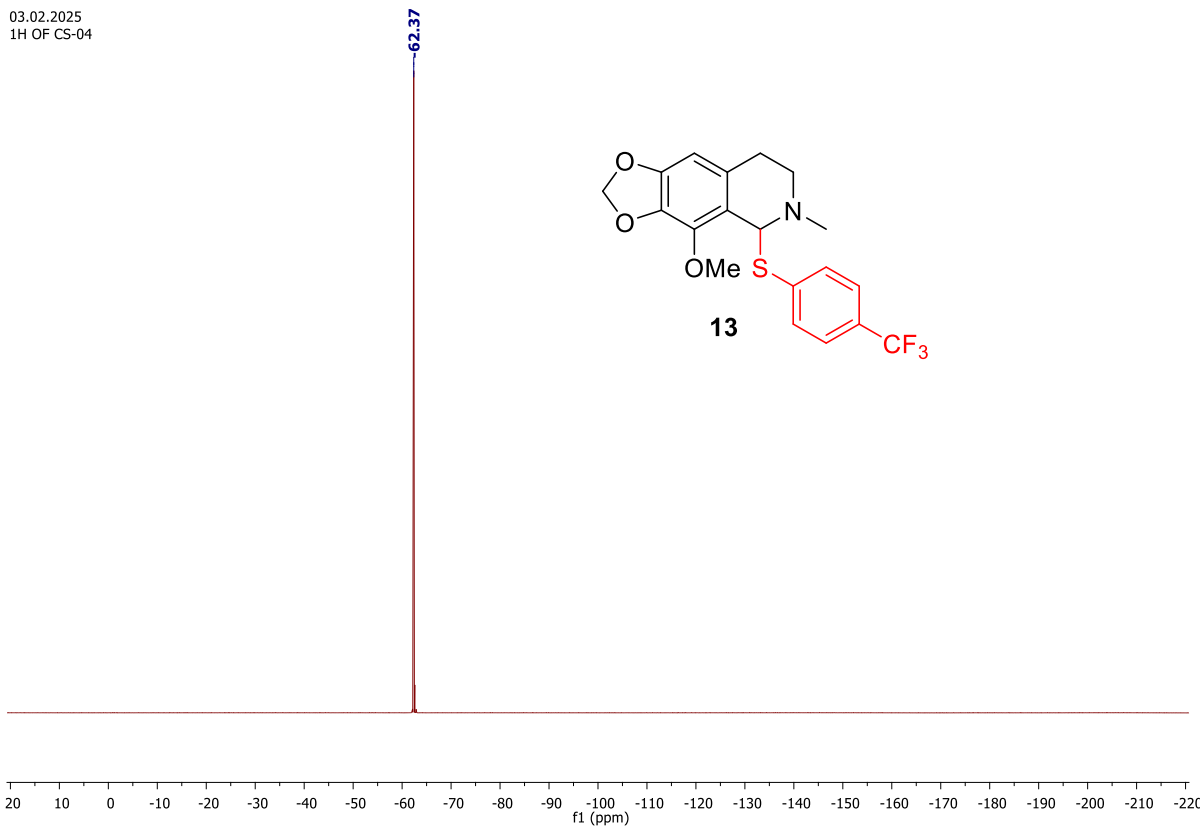

### <sup>1</sup>H NMR of Compound (14)

3.11.2021  
1H of PKB-583

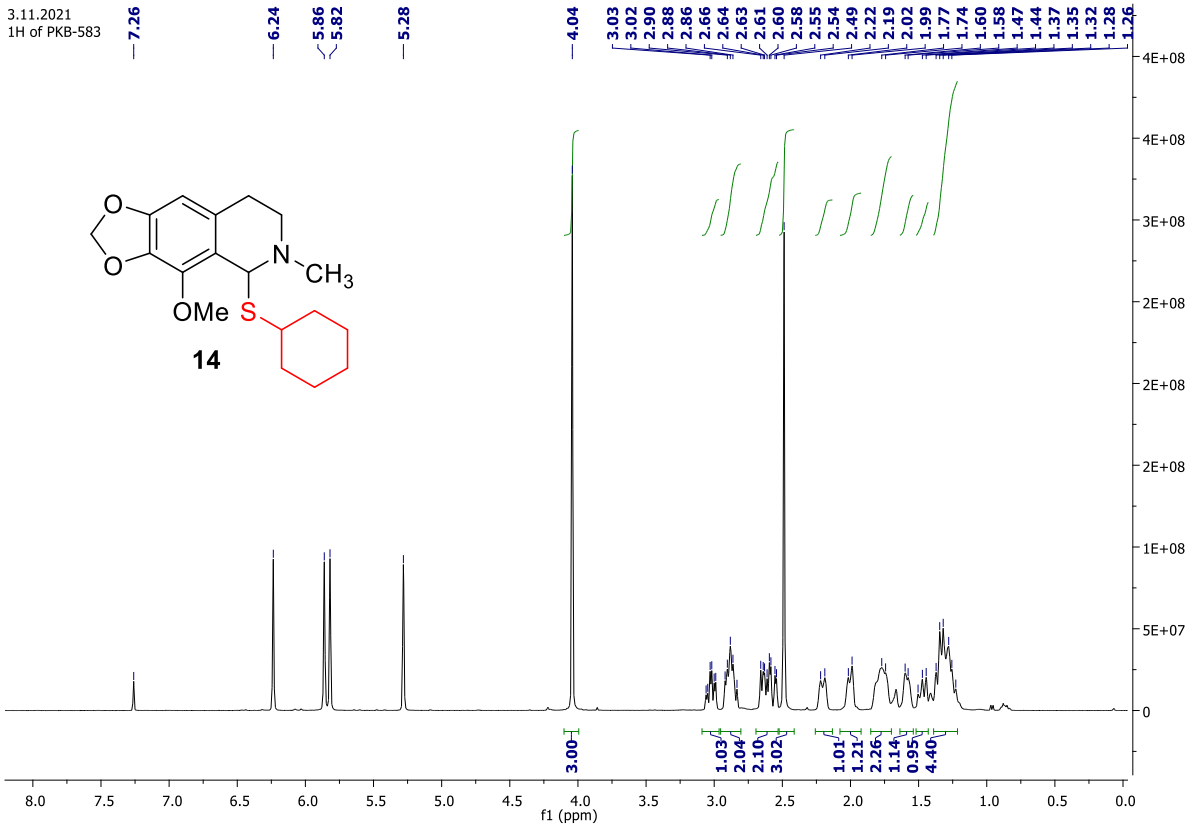

### <sup>13</sup>C NMR of Compound (14)

10.11.2021  
13C of PKB-583

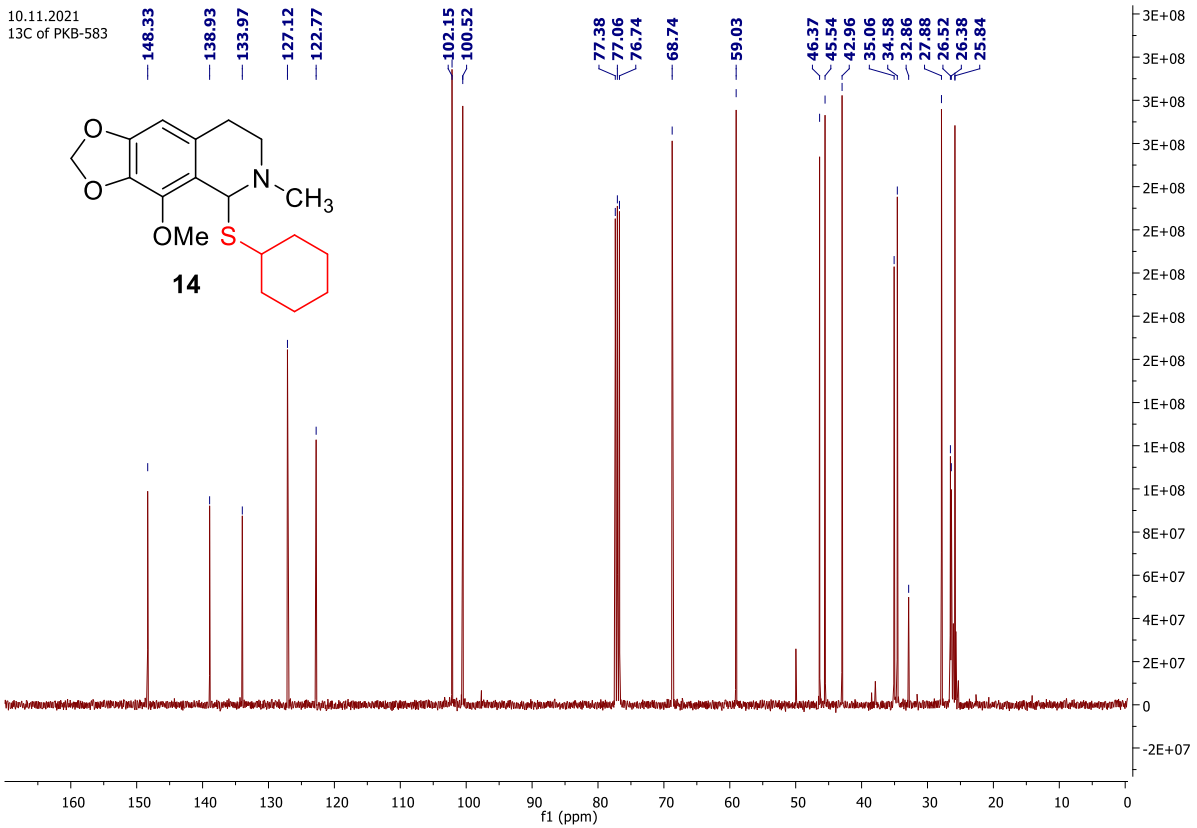



### <sup>1</sup>H NMR of Compound (15)

28.1.2022  
1H of PKB-602

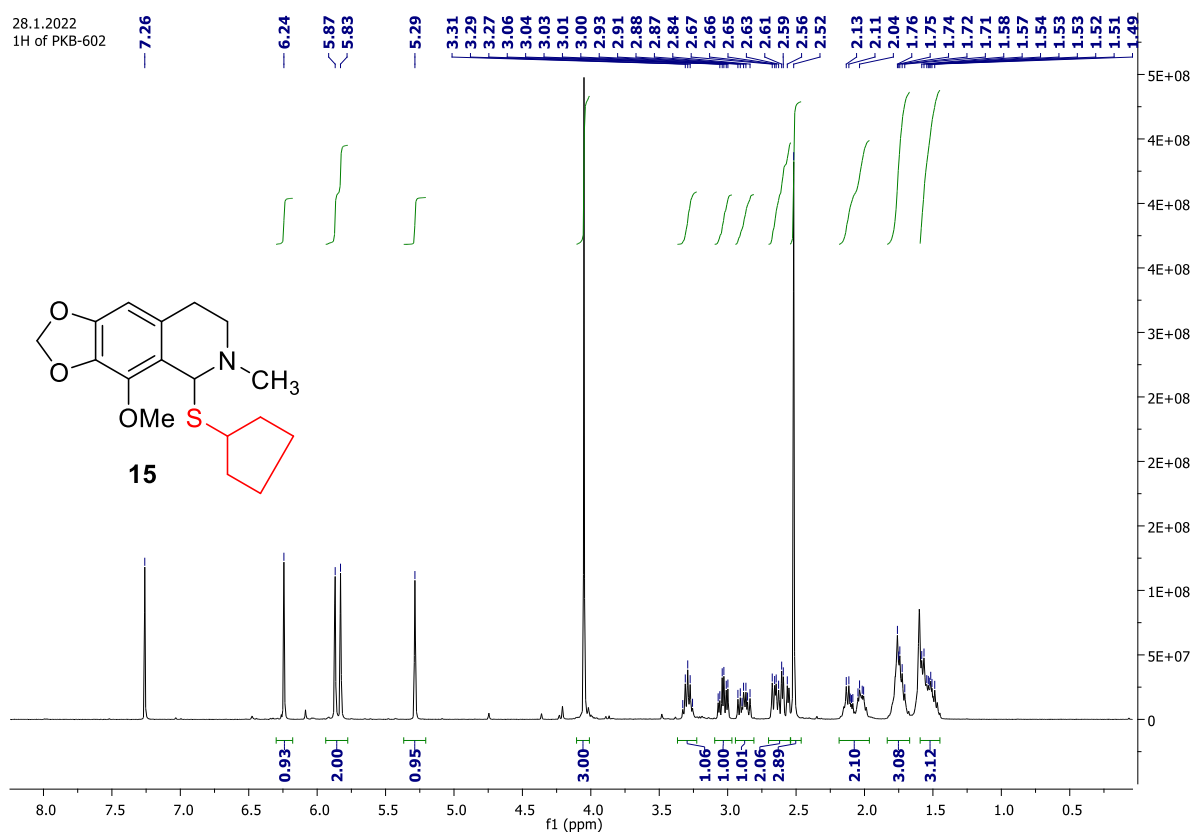

### <sup>13</sup>C NMR of Compound (15)

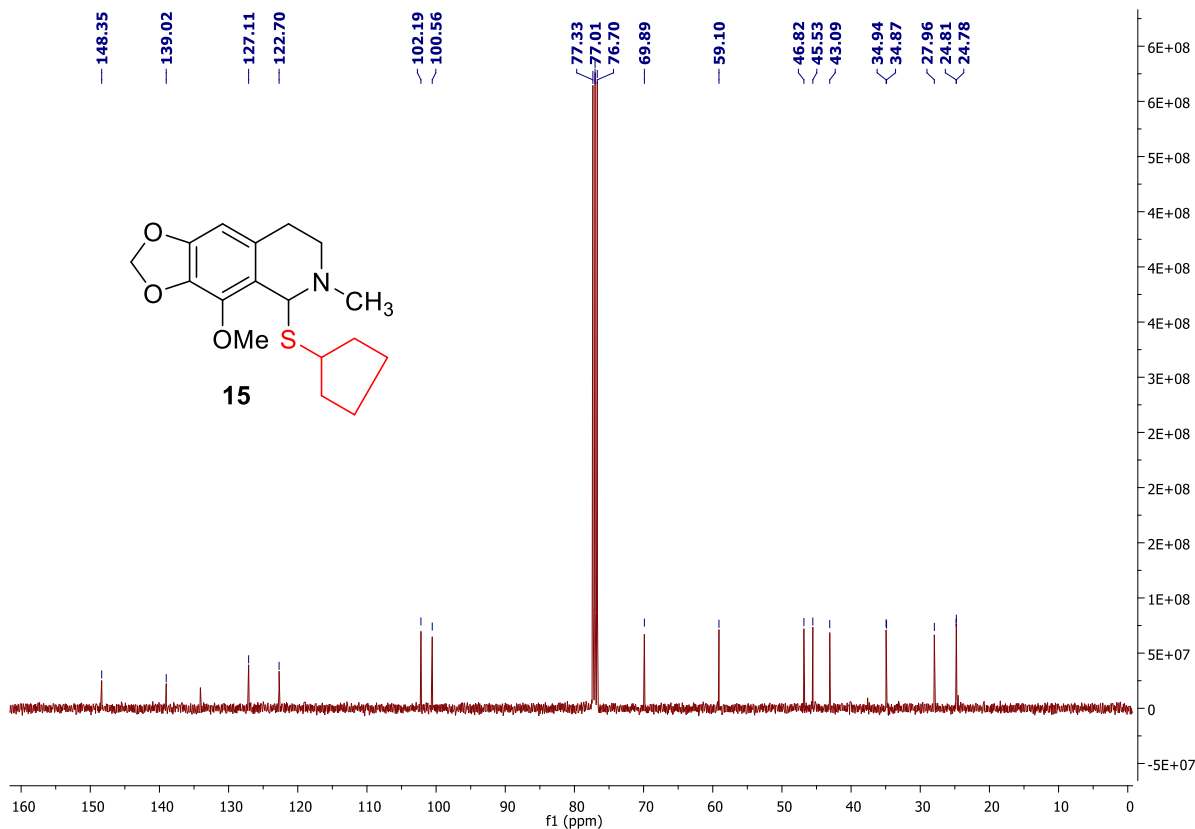

### <sup>1</sup>H NMR of Compound (16)

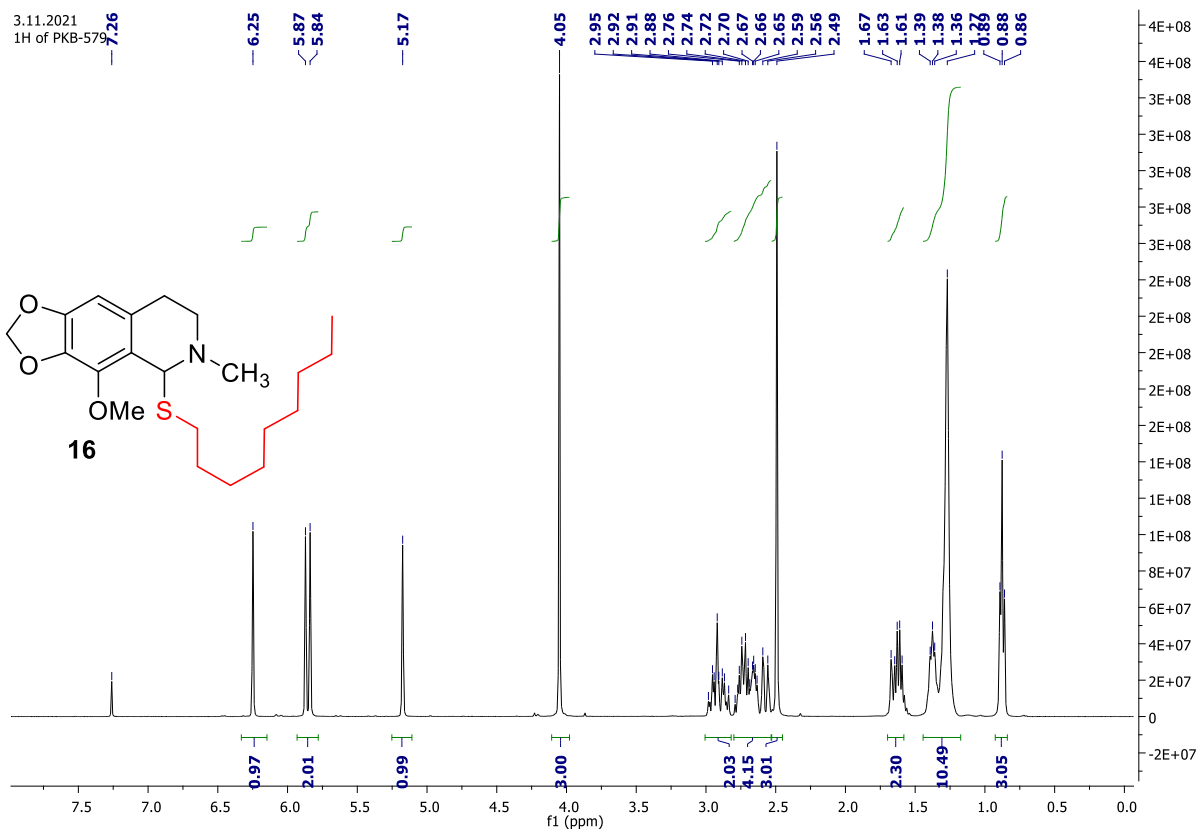

### <sup>13</sup>C NMR of Compound (16)

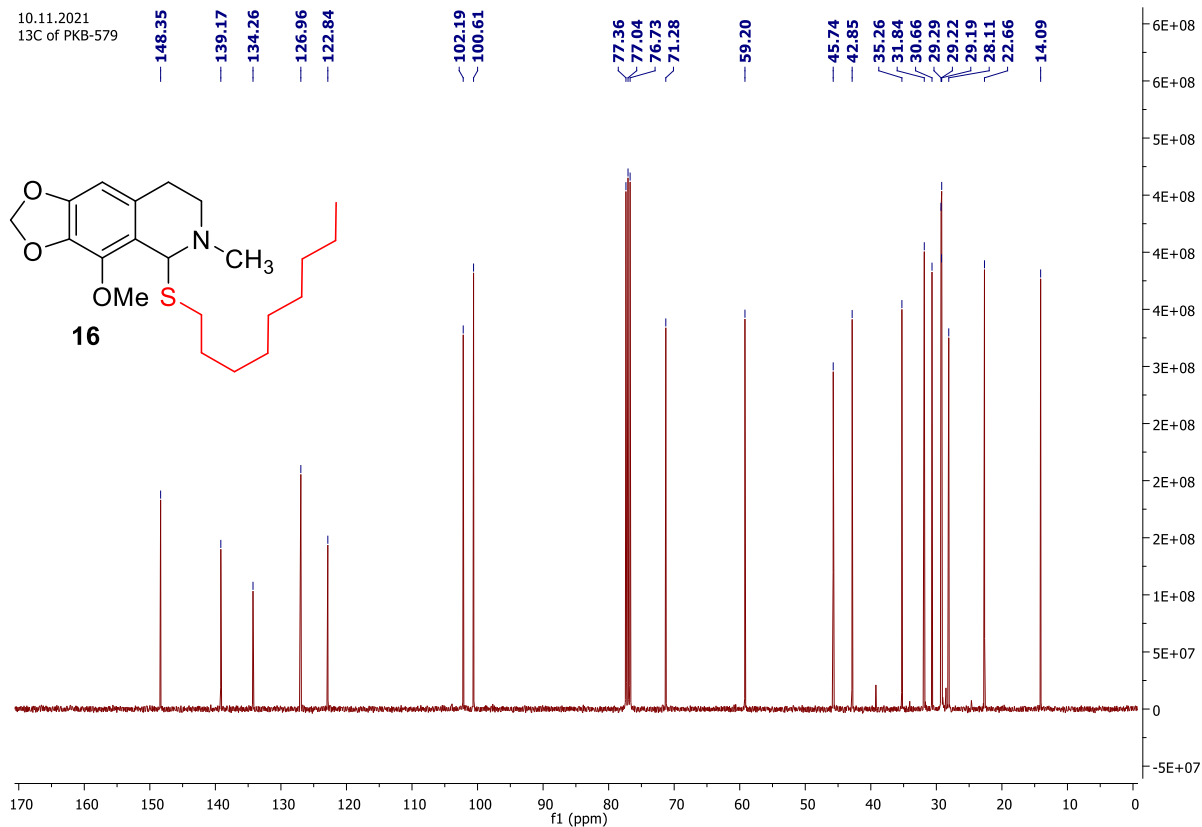

# <sup>1</sup>H NMR of Compound (17)

6.8.2024  
1H of LD-C-23

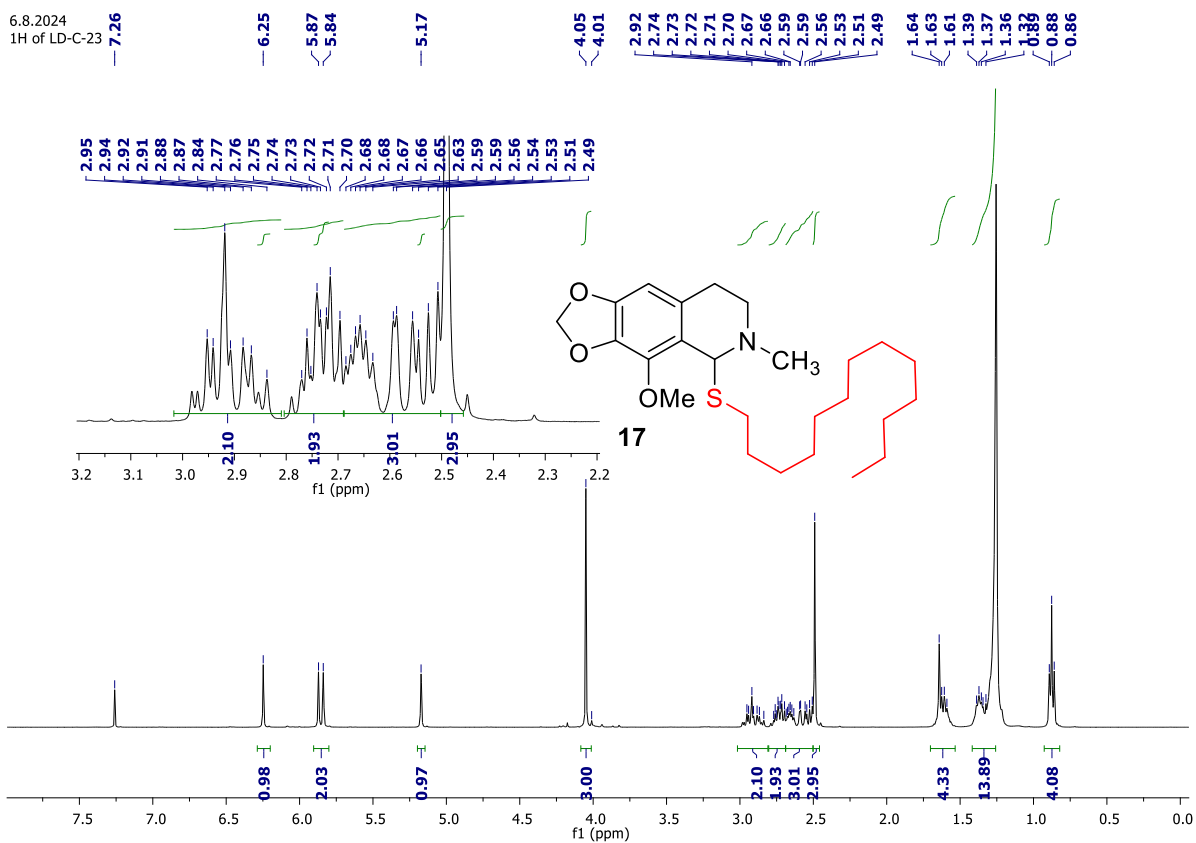

# <sup>13</sup>C NMR of Compound (17)

8.8.2024  
13C of LDC-23

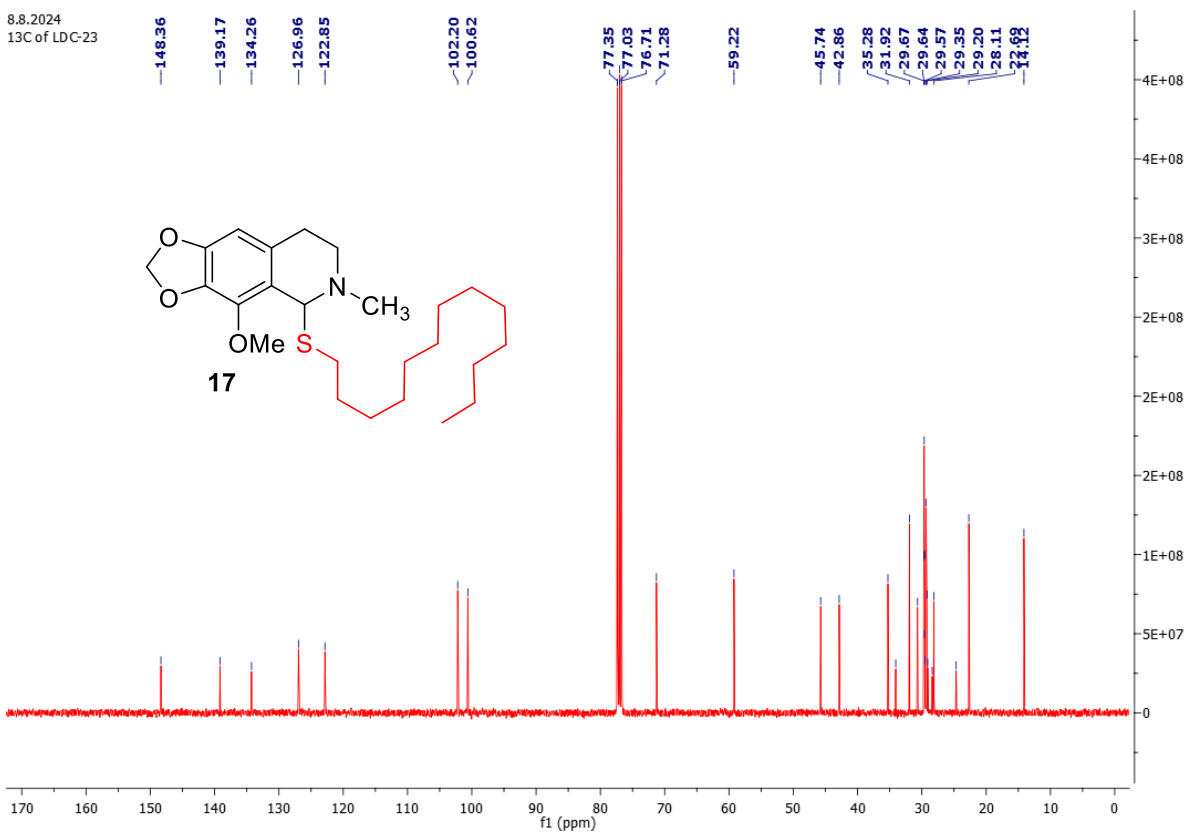

### <sup>1</sup>H NMR of Compound (18)

10.9.2024  
1H of LD-C-30

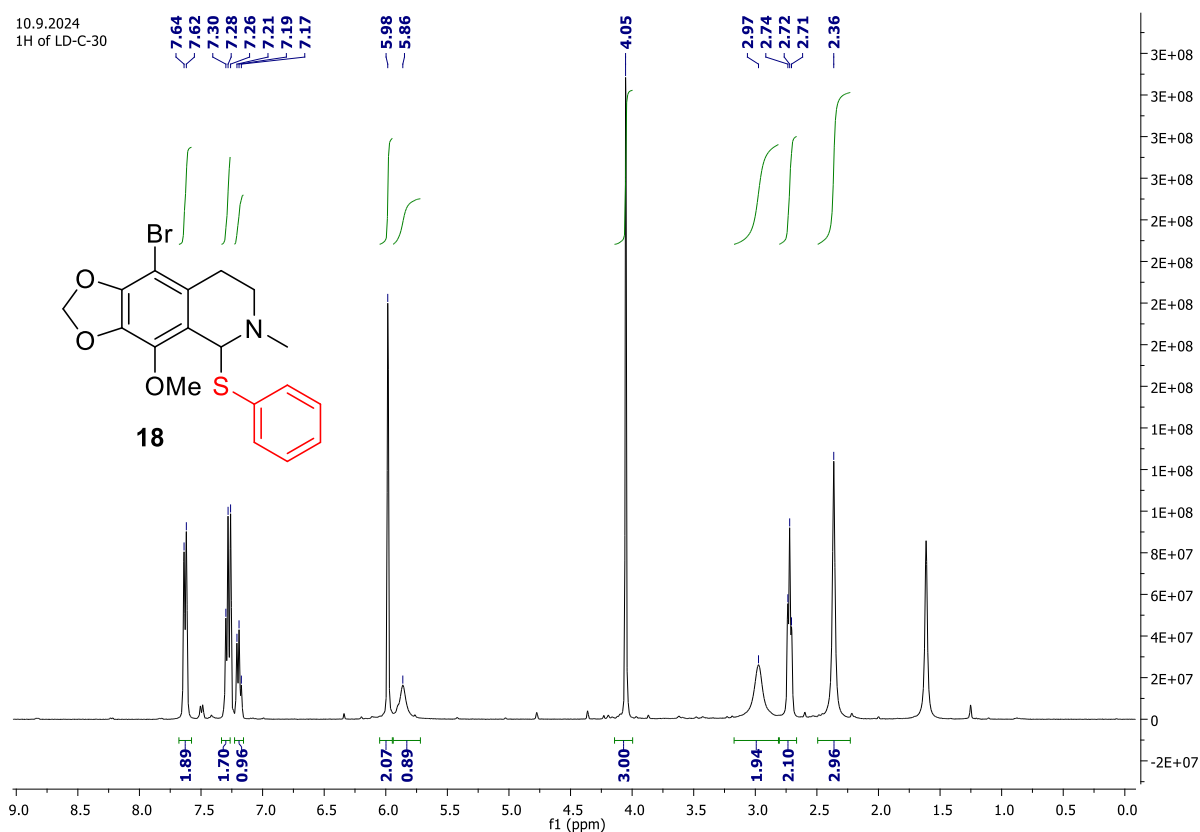

### <sup>13</sup>C NMR of Compound (18)

10.9.2024  
1H of LD-C-30

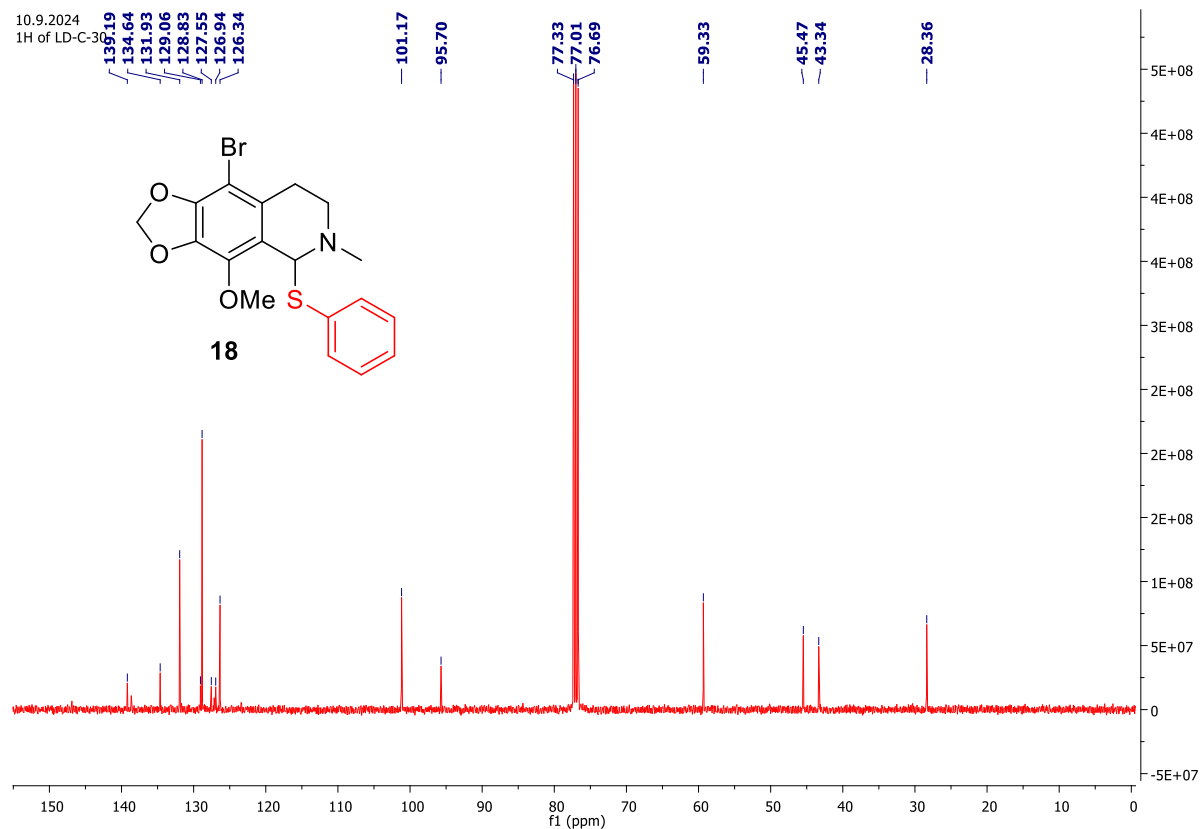

### <sup>1</sup>H NMR of Compound (19)

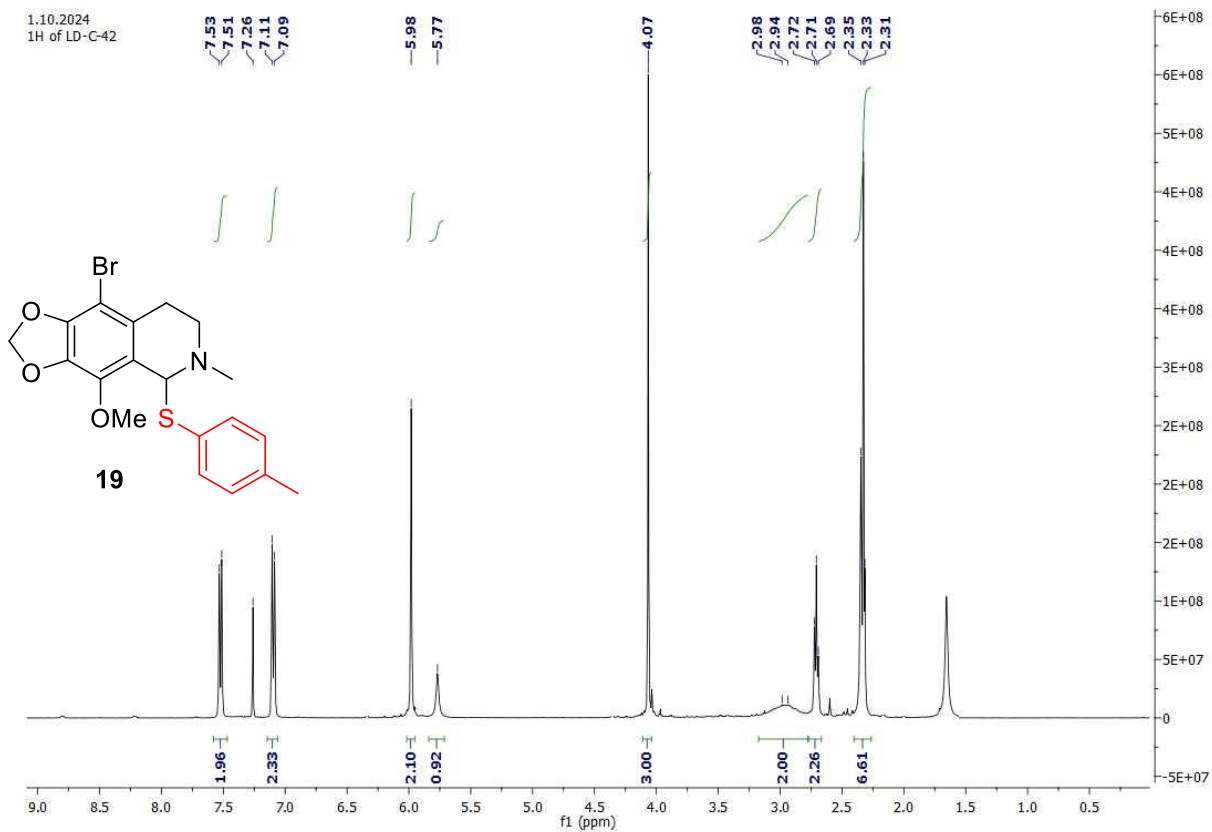

### <sup>13</sup>C NMR of Compound (19)

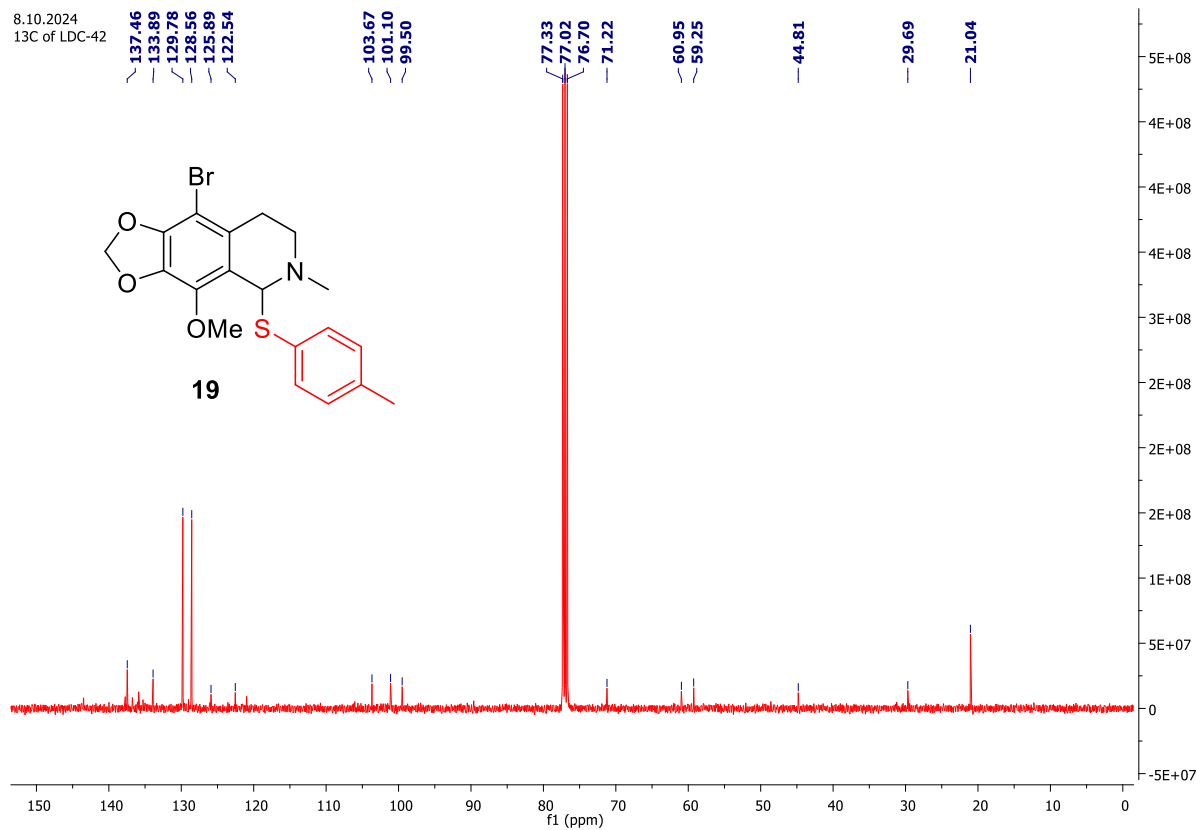

### <sup>1</sup>H NMR of Compound (20)

3.2.2025  
1H OF AD-AS-C-24

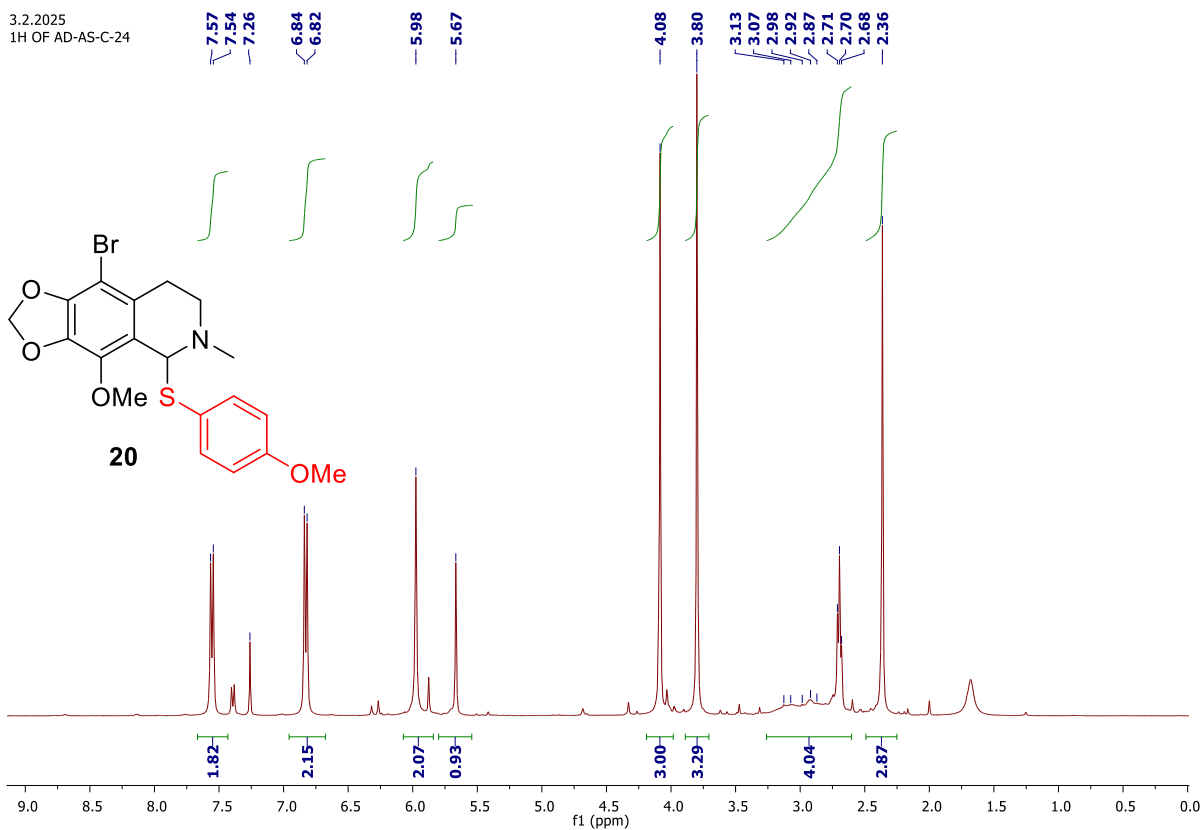

### <sup>13</sup>C NMR of Compound (20)

30.11.2023  
13C of LDC 24

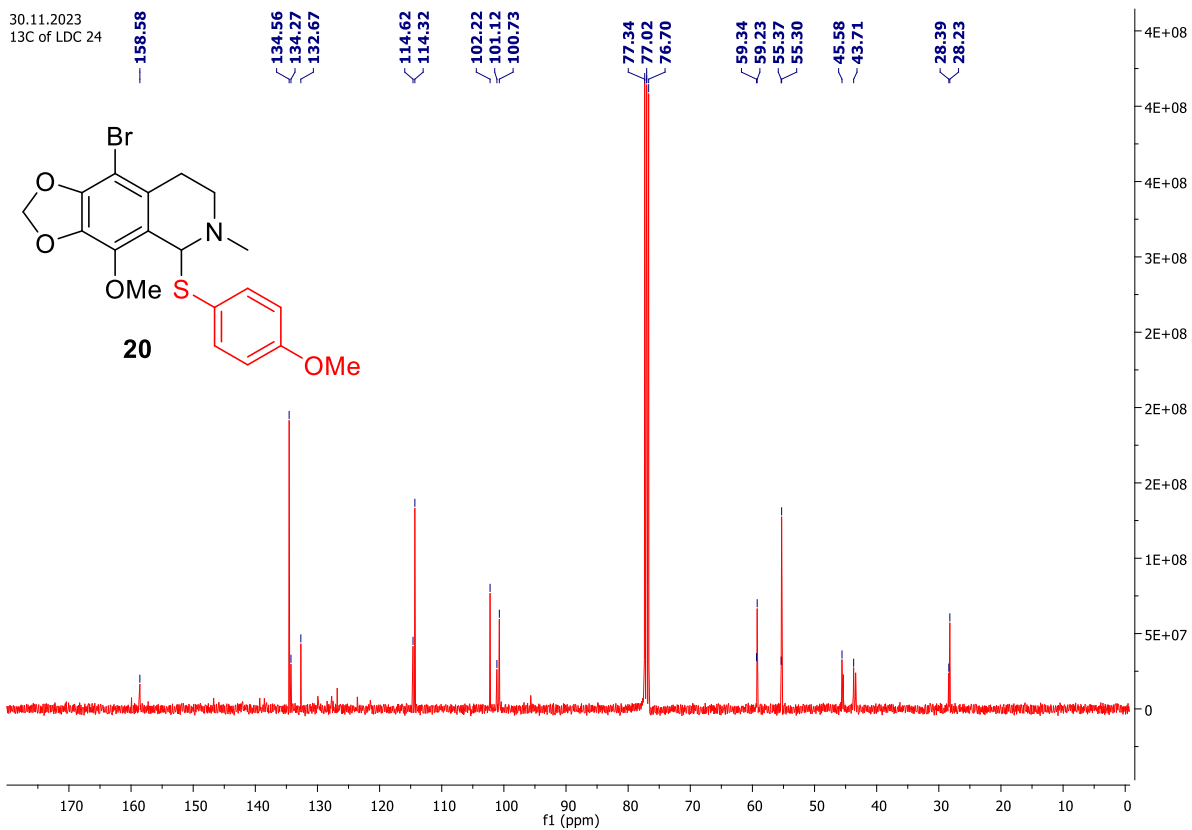

### <sup>1</sup>H NMR of Compound (21)

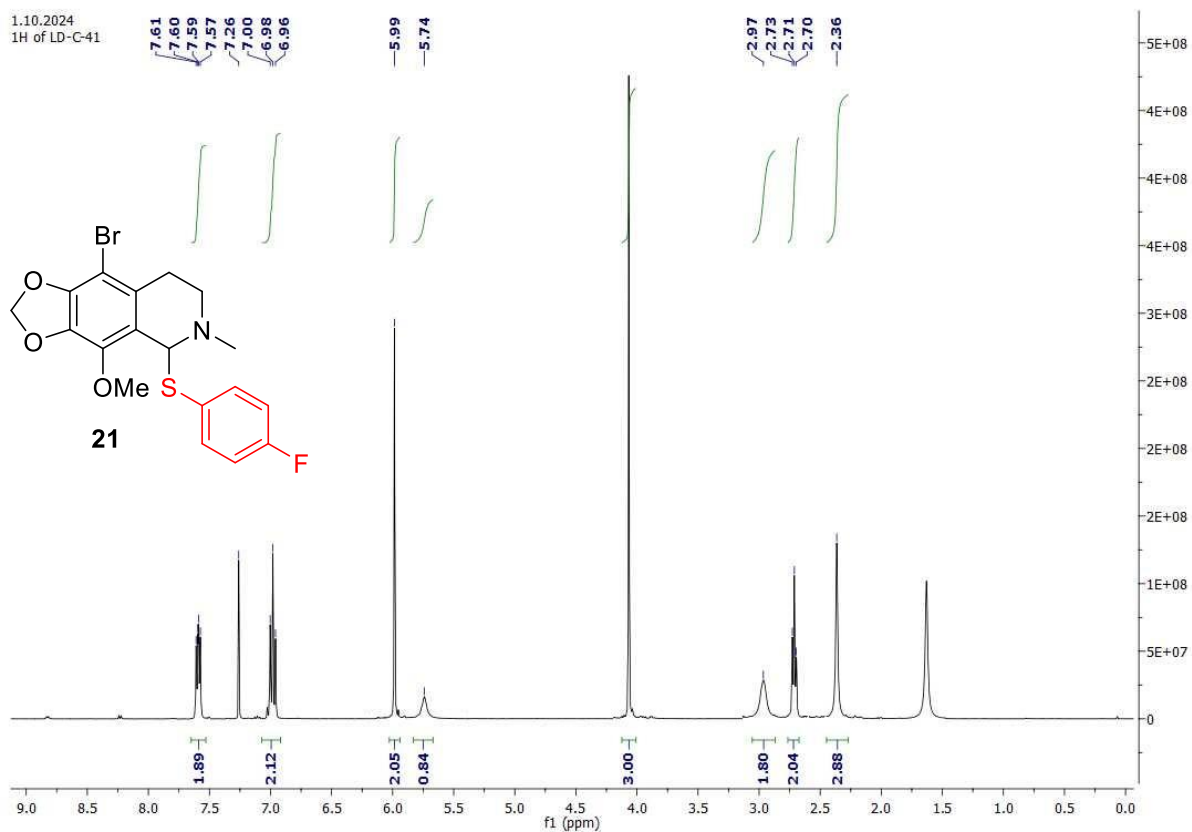

### <sup>13</sup>C NMR of Compound (21)

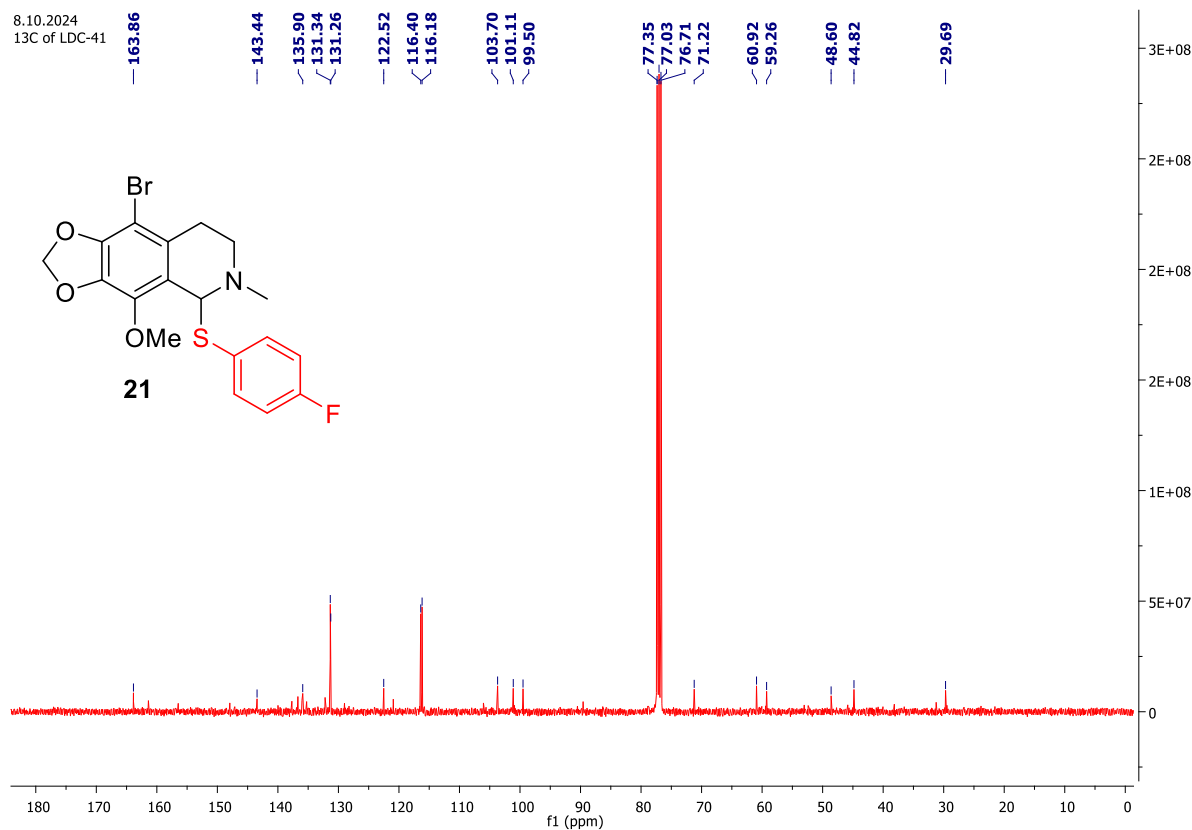

### <sup>19</sup>F NMR of Compound (21)

03.02.2025  
19F OF C-41

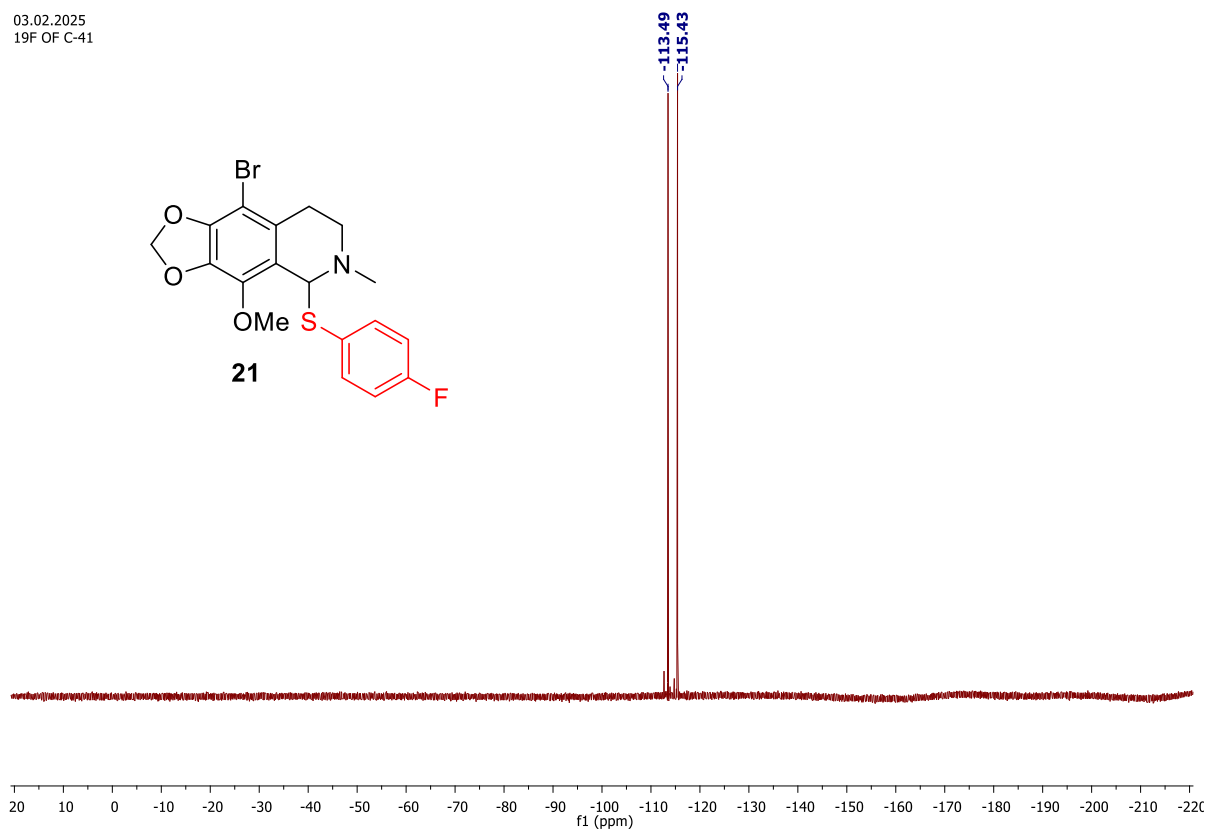

### <sup>1</sup>H NMR of Compound (22)

1.10.2024  
1H of LD-C-40

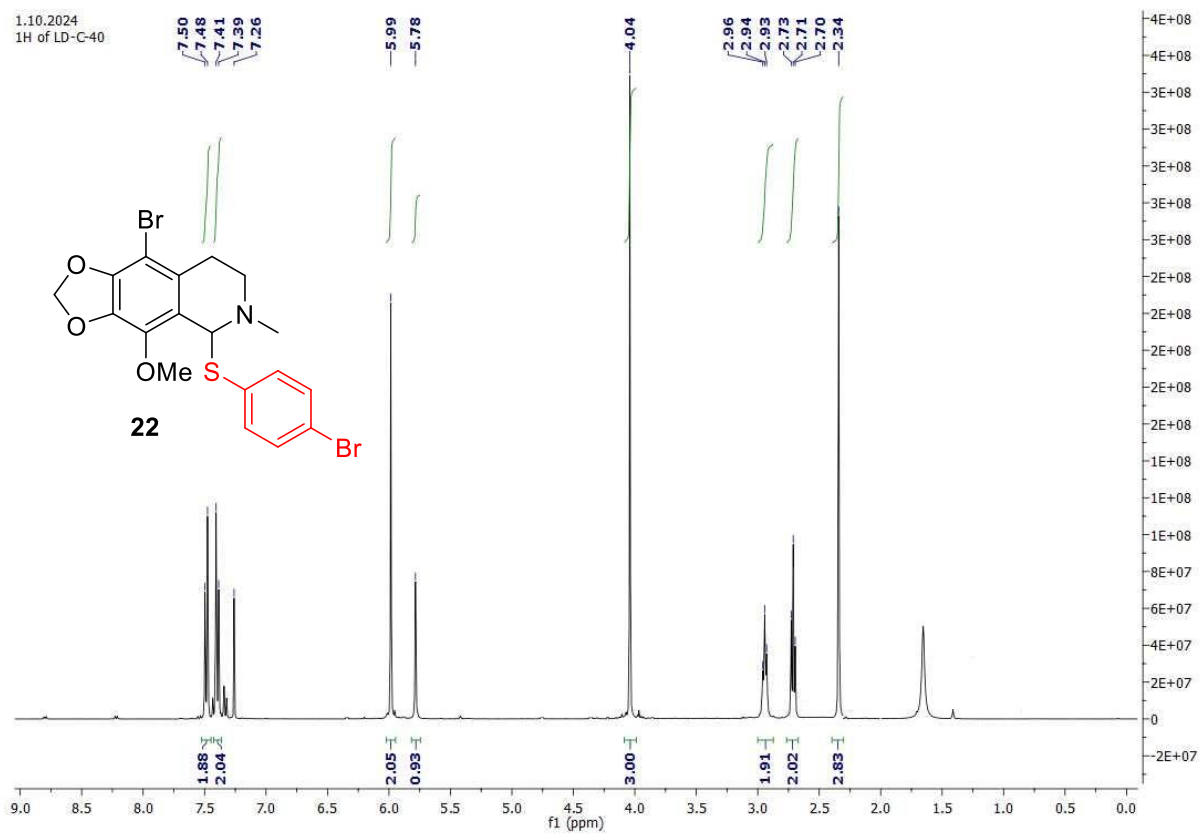



### <sup>13</sup>C NMR of Compound (22)

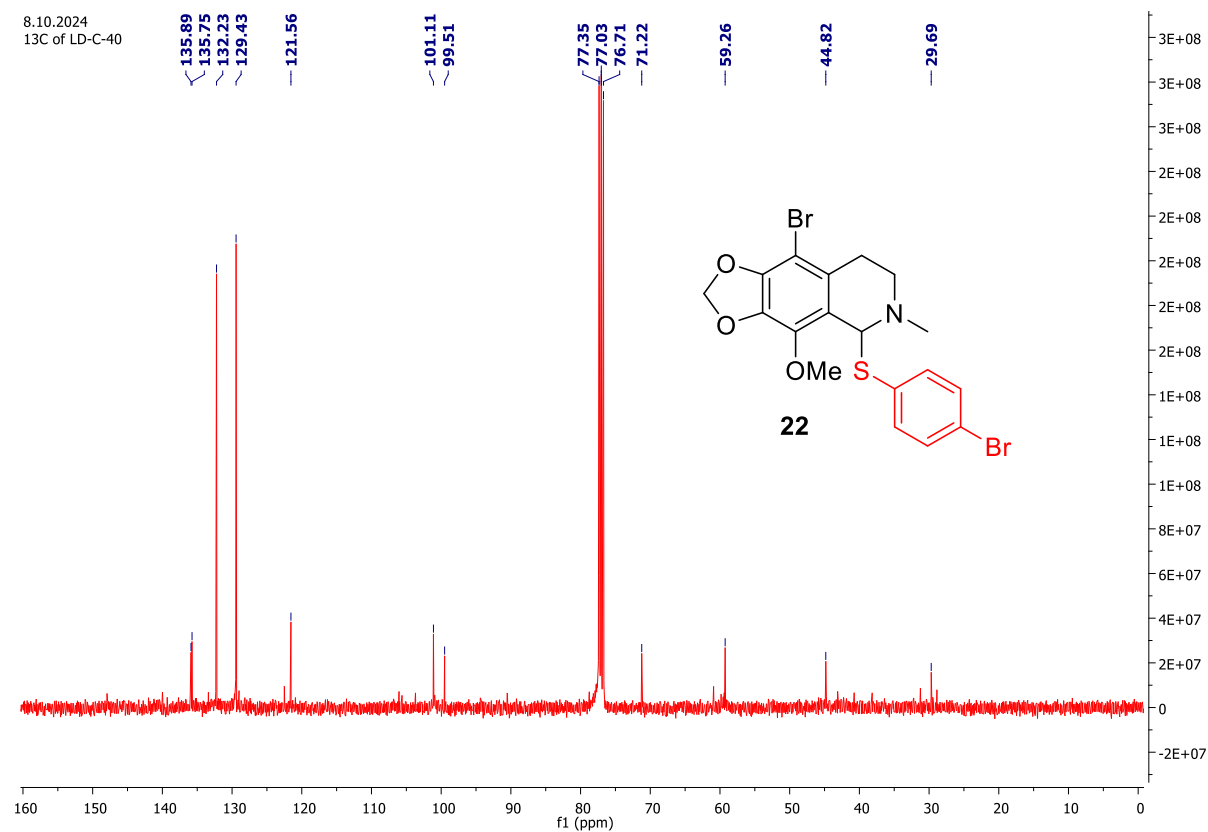

### <sup>1</sup>H NMR of Compound (23)

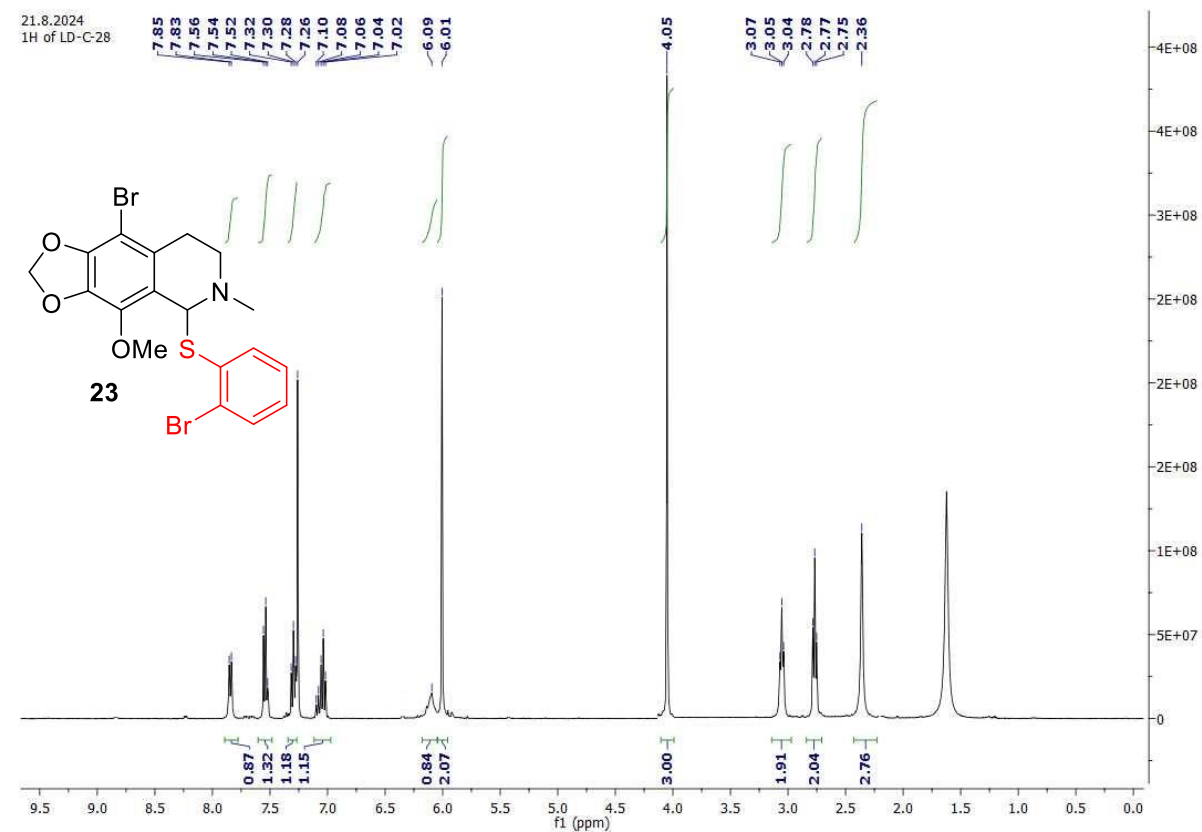

# <sup>13</sup>C NMR of Compound (23)

12.10.24T  
13C OF C-28

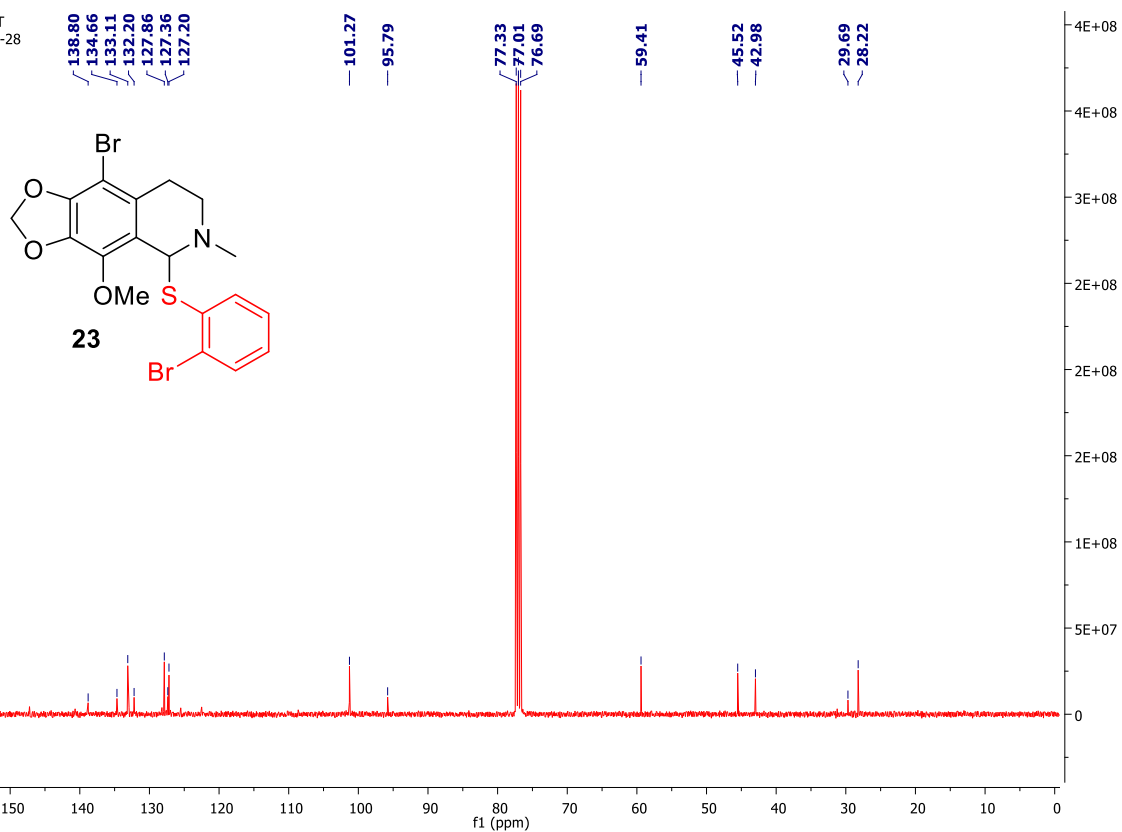

## 6. Crystallographic Data :

### Compound 1 : ORTEP Diagram

Light Brown Crystal,

Empirical Formula -  $C_{18}H_{19}NO_3S$ , M = 329.41

Crystal System – Monoclinic,

Mo Ka ( $\lambda = 0.71073 \text{ \AA}$ )

Space group P- 1, a = 10.9365(5)  $\text{\AA}$ , b = 7.9877(3)  $\text{\AA}$  c = 19.0534(9)  $\text{\AA}$  V = 1664.29 (13)

T = 299K.  $\theta_{\text{max}} = 27.525$ .

Refinement of 210 parameter on 3154 independent reflection.

$R_1 = 0.0739$   $wR_2 = 0.1827$  and S = 1.251

The crystal structure has been deposited at the Cambridge Crystallographic Data Centre (CCDC 2377839)

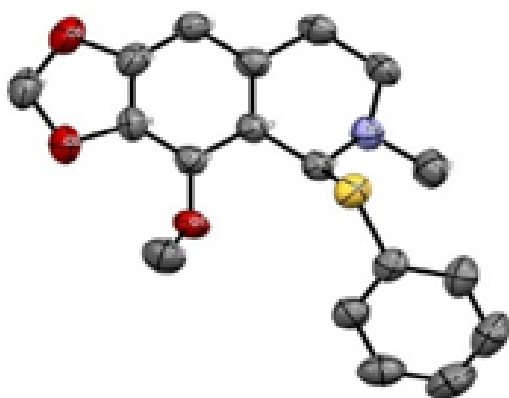

**Datablock aks013a\_0m\_a - ellipsoid plot**

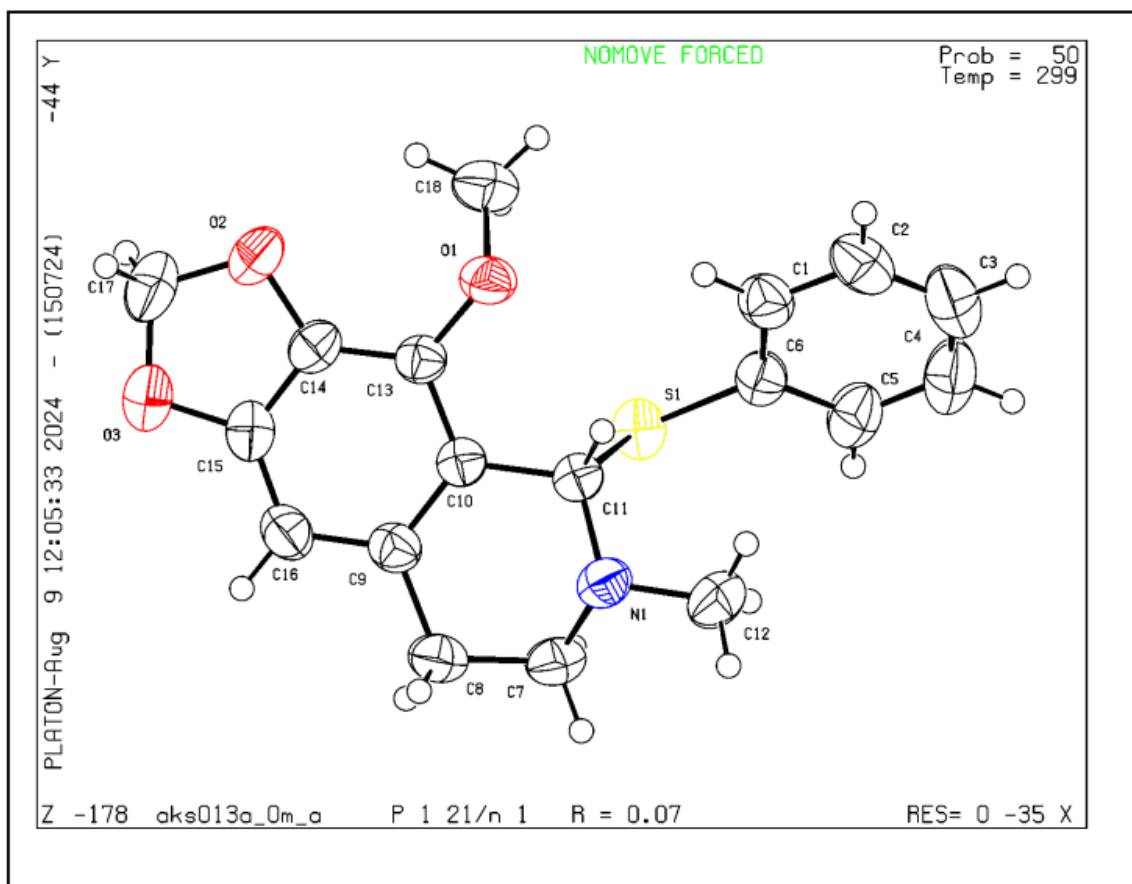

No syntax errors found.  
Please wait while processing ....

[CIF dictionary](#)  
[Interpreting this report](#)

**Datablock: aks013a\_0m\_a**

|                        |                                             |                                        |
|------------------------|---------------------------------------------|----------------------------------------|
| Bond precision:        | C-C = 0.0029 Å                              | Wavelength=0.71073                     |
| Cell:                  | a=10.9365(5)    b=7.9877(3)    c=19.0534(9) | alpha=90    beta=90.804(2)    gamma=90 |
| Temperature:           | 299 K                                       |                                        |
| Volume                 | Calculated<br>1664.29(13)                   | Reported<br>1664.29(13)                |
| Space group            | P 21/n                                      | P 1 21/n 1                             |
| Hall group             | -P 2yn                                      | -P 2yn                                 |
| Moiety formula         | C18 H19 N O3 S                              | C18 H19 N O3 S                         |
| Sum formula            | C18 H19 N O3 S                              | C18 H19 N O3 S                         |
| Mr                     | 329.40                                      | 329.40                                 |
| Dx, g cm <sup>-3</sup> | 1.315                                       | 1.315                                  |
| Z                      | 4                                           | 4                                      |
| Mu (mm <sup>-1</sup> ) | 0.209                                       | 0.209                                  |
| F000                   | 696.0                                       | 696.0                                  |
| F000'                  | 696.80                                      |                                        |
| h,k,lmax               | 14,10,24                                    | 14,10,24                               |
| Nref                   | 3842                                        | 3838                                   |
| Tmin,Tmax              | 0.985,0.992                                 | 0.664,0.746                            |
| Tmin'                  | 0.983                                       |                                        |
| Correction method=     | # Reported T Limits: Tmin=0.664 Tmax=0.746  |                                        |
| AbsCorr =              | NONE                                        |                                        |
| Data completeness=     | 0.999                                       | Theta(max)= 27.525                     |
| R(reflections)=        | 0.0739( 3154)                               | wR2(reflections)= 0.1827( 3838)        |
| S =                    | 1.251                                       | Npar= 210                              |

## 7. HRMS Data:

**CHNS Analysis (Compound 1):** C<sub>12</sub>H<sub>14</sub>NO<sub>3</sub><sup>+</sup>; Mass - **220.0978**; Elemental Composition:  
C - 65.44; H - 6.41; N - 6.36; O - 21.79.

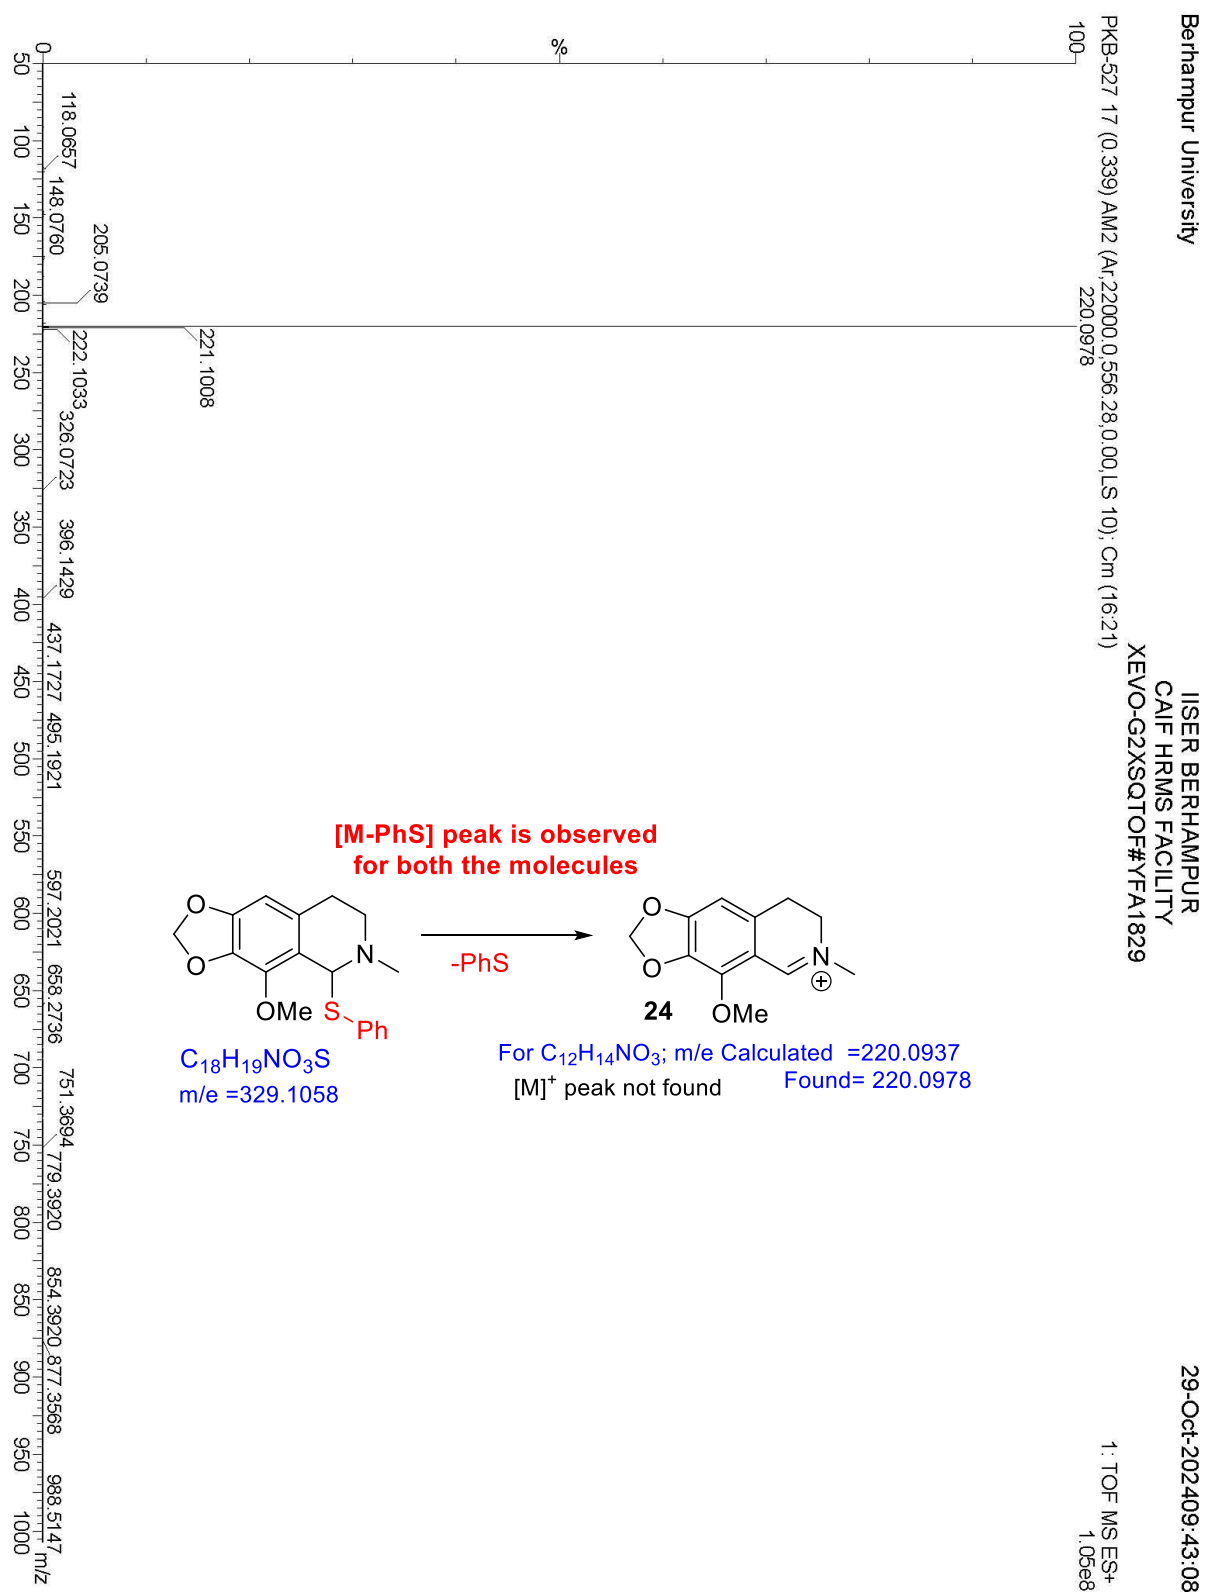

**CHNS Analysis (Compound 17):** C<sub>12</sub>H<sub>13</sub>BrNO<sub>3</sub><sup>+</sup> ; Mass - **298.0085**; Elemental Composition: C, 48.18; H, 4.38; Br, 26.71; N, 4.68; O, 16.04

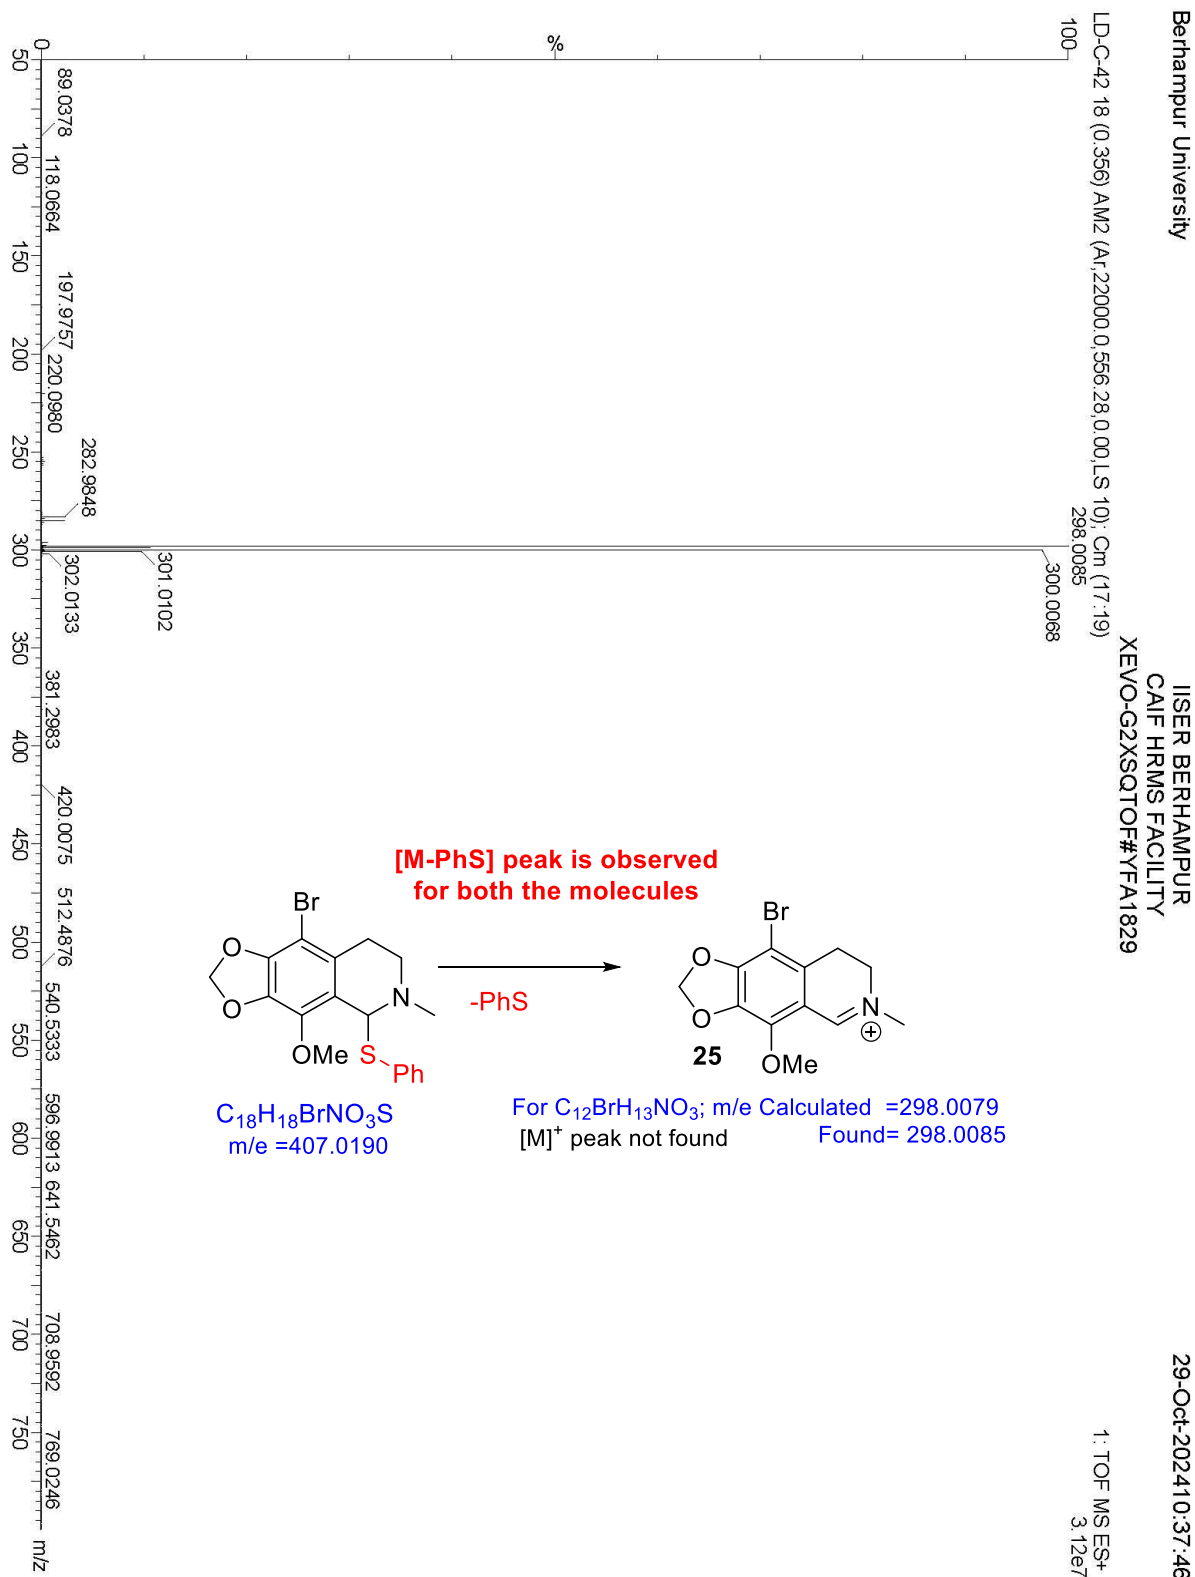

Supplement: d5nj00005j1.pdf [file d5nj00005j1.pdf]
